# Supplementary material for: Early Signs of Molecular Defects in iPSC-Derived Neural Stems Cells from Patients with Familial Parkinson’s Disease
Source: MDPI journal article supplement (doi:10.3390/biom12070876), 2022-06-23
Supplement: s1 [file s1]

## Supplementary Methods

**RNA sequencing and bioinformatics analysis.** Total cellular RNA was extracted from the following samples and sequenced on an Illumina HiSeq sequencer at the European Molecular Biology Laboratory (EMBL): PD and CTR iPSCs differentiated into NPCs (two lines each; PD1/PD2 and CTR1/CTR2). RNA libraries were prepared with the TruSeq RNA Sample Preparation Kit V2 (Illumina). Raw RNA-seq reads were quality checked using FastQC ([www.bioinformatics.babraham.ac.uk/projects/fastqc/](http://www.bioinformatics.babraham.ac.uk/projects/fastqc/)). Contaminants were detected and removed utilizing a combination of an in-house-developed algorithm and already available tools (5). Following pre-processing, GSNAP spliced aligner (6) was utilized to map the RNA-seq reads against the reference genome (GRCh37/hg19 genome assembly). GSNAP has been appropriately parameterized in order to detect novel and known splice junctions. Differential expression analysis was performed using DESeq (7). Specifically, differential expressed genes with fold change  $>1$  ( $p < 0.05$ ) were identified using all expressed genes ( $>10$  raw read counts per gene). Correction for false discovery rate (FDR) was not applied due to the limited number of the resulting differential expressed genes. Heat maps were implemented using R/Bioconductor (8, 9) (Clustering: Pearson's correlation coefficient, row-wise scaling: centering and scaling using Z-scores). Enrichment analyses were performed against Gene Ontology10 using the hypergeometric distribution, KEGG and Reactome pathway databases. All gene annotations were derived from Ensembl (10). Heat maps were generated using R programming language in RStudio v1.1.456. All gene annotations were derived from Ensembl (10). Gene Ontology (GO) Enrichment analyses were performed using the Database for Annotation, Visualisation and Integrated Discovery (DAVID) v6.8 (<https://david.ncifcrf.gov>).

**qPCR analysis.** Quantitative PCR analyses were carried out in a Light Cycler96 (Roche) Real time PCR detection system using KAPA SYBR FAST qPCR Master Mix (KapaBiosystems). The analysis of expression levels was based on the comparative CT Method ( $2^{-\Delta\Delta CT}$  Method) (Livak and Schmittgen, 2001; Schmittgen and Livak, 2008). Briefly, this approach calculates mean  $C_T$  values of the target and reference gene (GAPDH) and the values of the reference gene are subtracted from target gene ( $\Delta C_t$ ). The biggest  $\Delta C_t$  value is then subtracted from all samples, giving the  $\Delta\Delta C_t$ . The negative value of this subtraction ( $-\Delta\Delta C_t$ ) is then used as the exponent of 2 and this value represents the fold change of expression. Differences between PD and CTR mRNA levels of selected transcripts from 3 independent differentiation procedures were assessed by two tailed unpaired T-test ( $p < 0.05$ ).

**Artificial synapse formation assay.** To address whether p.A53T- $\alpha$ Syn causes early synaptogenesis defects artificial synapse formation assays (ASFs) were employed as they represent a powerful tool to screen CAMs (Biederer and Scheiffele, 2007). ASFs are co-cultures of non-neuronal cells that present a post-synaptic adhesion neuronal protein on their plasma membrane, with neurons. These proteins are adequate to induce the formation of presynaptic specializations (Biederer and Scheiffele, 2007). In the present study iPSC-

derived neurons were employed to investigate the synaptic connections between mutant neurons and HEK293T cells overexpressing two of the most well studied postsynaptic molecules, NLGN2 and NLGN4, which belong to the family of neuroligins, a class of four major cell adhesion molecules (Biederer and Scheiffele, 2007). Therefore no additional positive control plasmids were required for this study.

HEK293T (500K cells/well) were plated in 6-well plates and transfected with EGFP (control plasmid, pCMV-EGFP, InVitrogen), and hemagglutinin (HA) tagged NLGN2 (pCMV3-SP-NLGN2-HA, SINO Biological) and NLGN4 (Pcag-HA-NLGN4, Addgene) plasmids using calcium phosphate. Transfected HEK293T cells, were incubated at 37°C for 16-18 hours and cells with transfection efficiency of ~75-80% were dissociated and seeded at a density of 20k cells/well on neurons for 24 hours. Co-cultures were fixed with 4% PFA and stained for Synapsin1 and HA antibodies, to visualize the presynaptic induction of the selected postsynaptic molecules. Artificial contacts were captured by confocal imaging and analyzed by ImageJ software. To semi-automatically quantify the artificial synaptic potency of the two neuroligins, a pipeline based on the co-culture index (C.I.) measurement was used. Briefly, this approach counts the Synapsin1 density that is related to the target HEK293T cells, in a 2  $\mu$ m radius ring inward and outward from the edge HEK293T, and excludes background Synapsin1 distribution, in a 4  $\mu$ m radius ring 10  $\mu$ m away from the HEK293T. HEK293T cells with  $CI \geq 1$  are considered as positive cells and synaptic formation is measured (Jiang et al., 2017). Data was derived from n=2-3 independent culture systems.

### Supplementary References

Livak KJ, Schmittgen TD. 2001. Analysis of relative gene expression data using real-time quantitative PCR and the 2<sup>-</sup>( $\Delta\Delta C_T$ ) method. *Methods* 25: 402– 408.

Schmittgen TD, Livak KJ. 2008. Analyzing real-time PCR data by the comparative  $C_T$  method. *Nat Protoc* 3: 1101– 1108.

Thomas Biederer and Peter Scheiffele, 2007. Mixed-culture assays for analyzing neuronal synapse formation. *Nat Protoc* 2(3):670-6.

Jiang, W. *et al.* 2017. Identification of Protein Tyrosine Phosphatase Receptor Type O (PTPRO) as a Synaptic Adhesion Molecule that Promotes Synapse Formation. *J Neurosci* 37, 9828-9843.

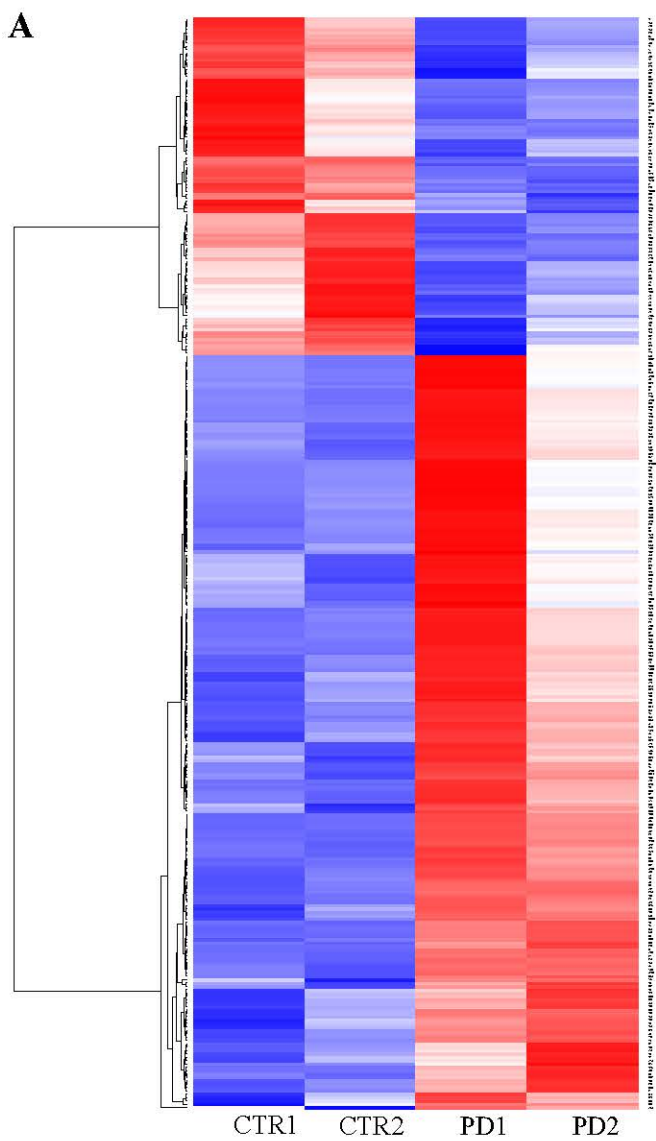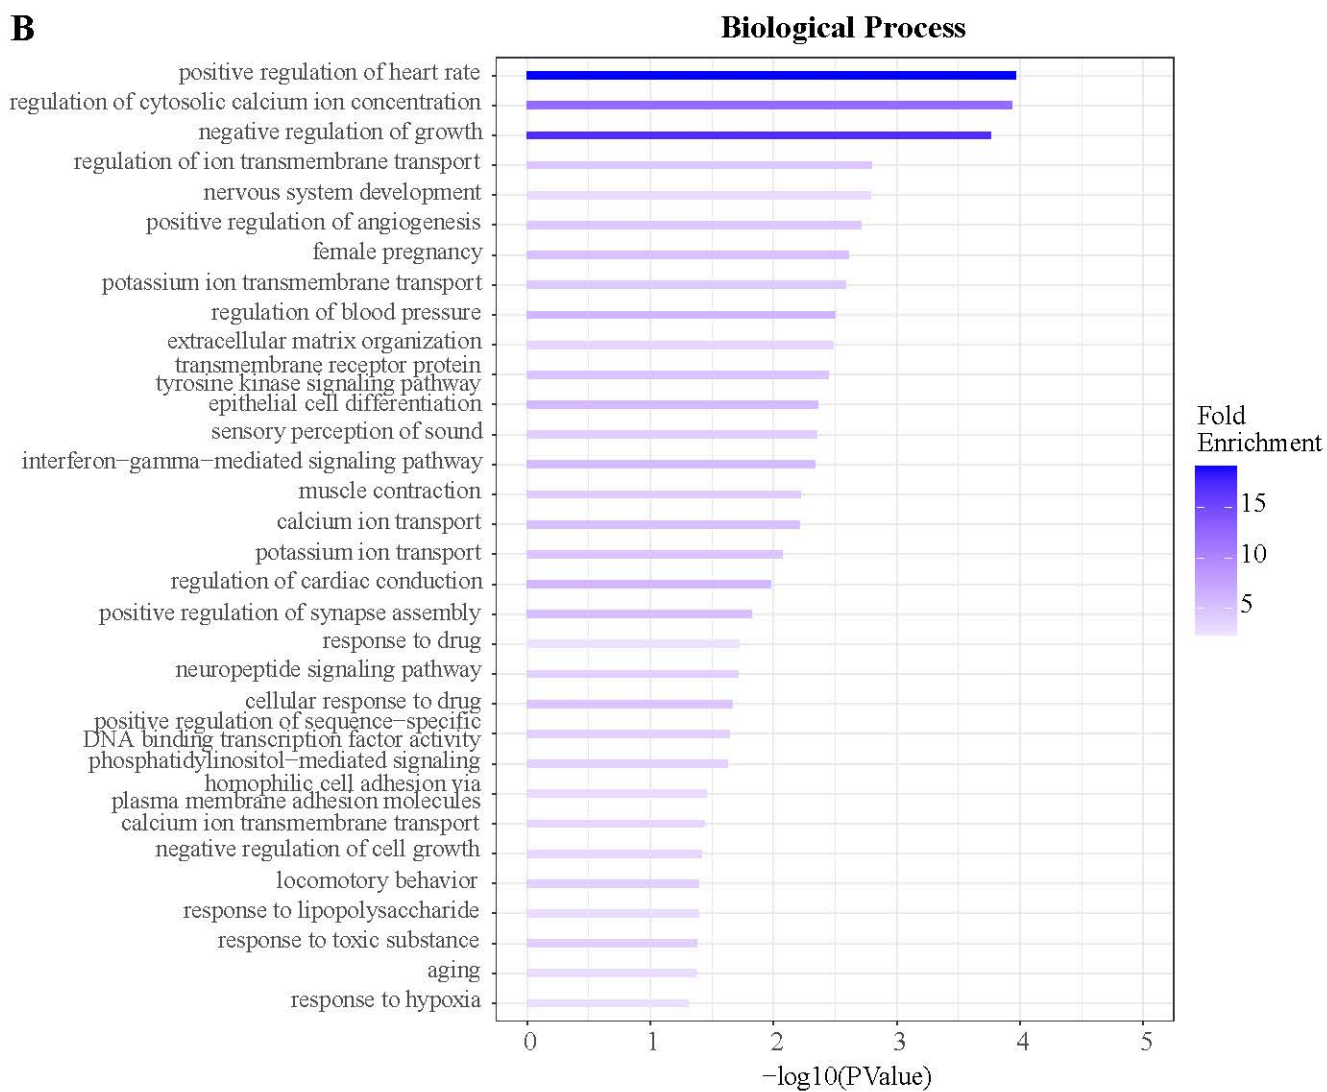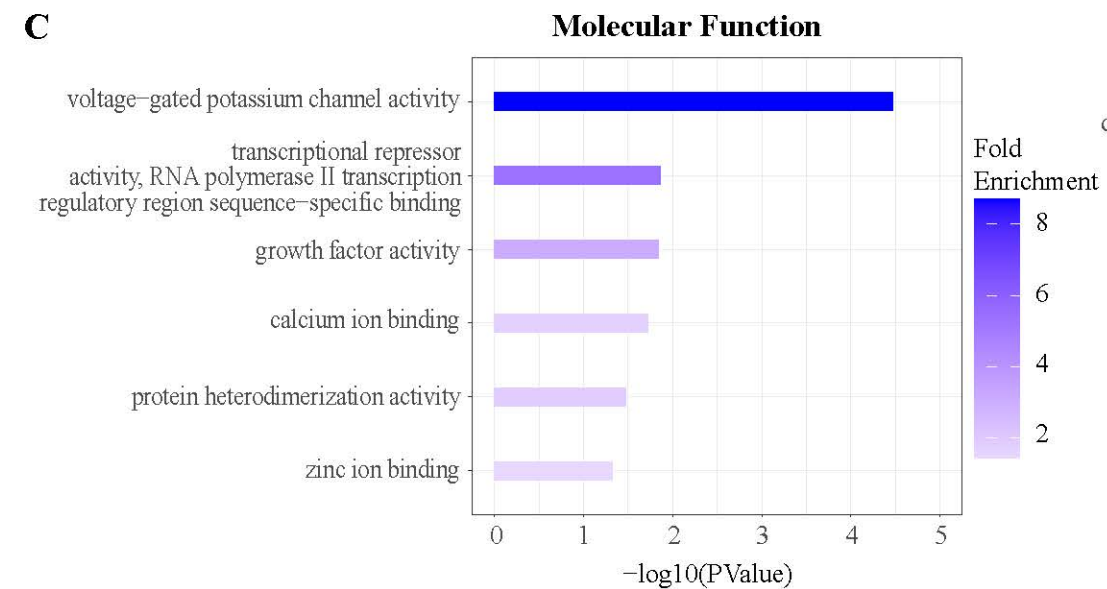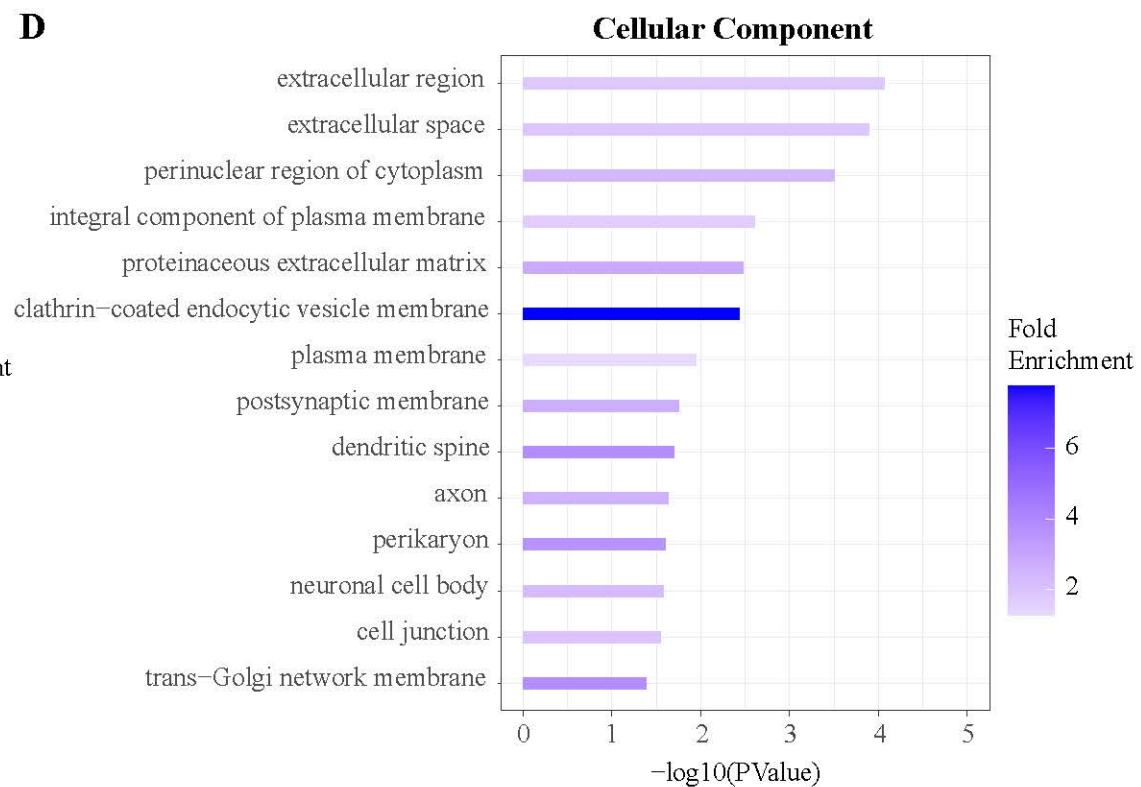

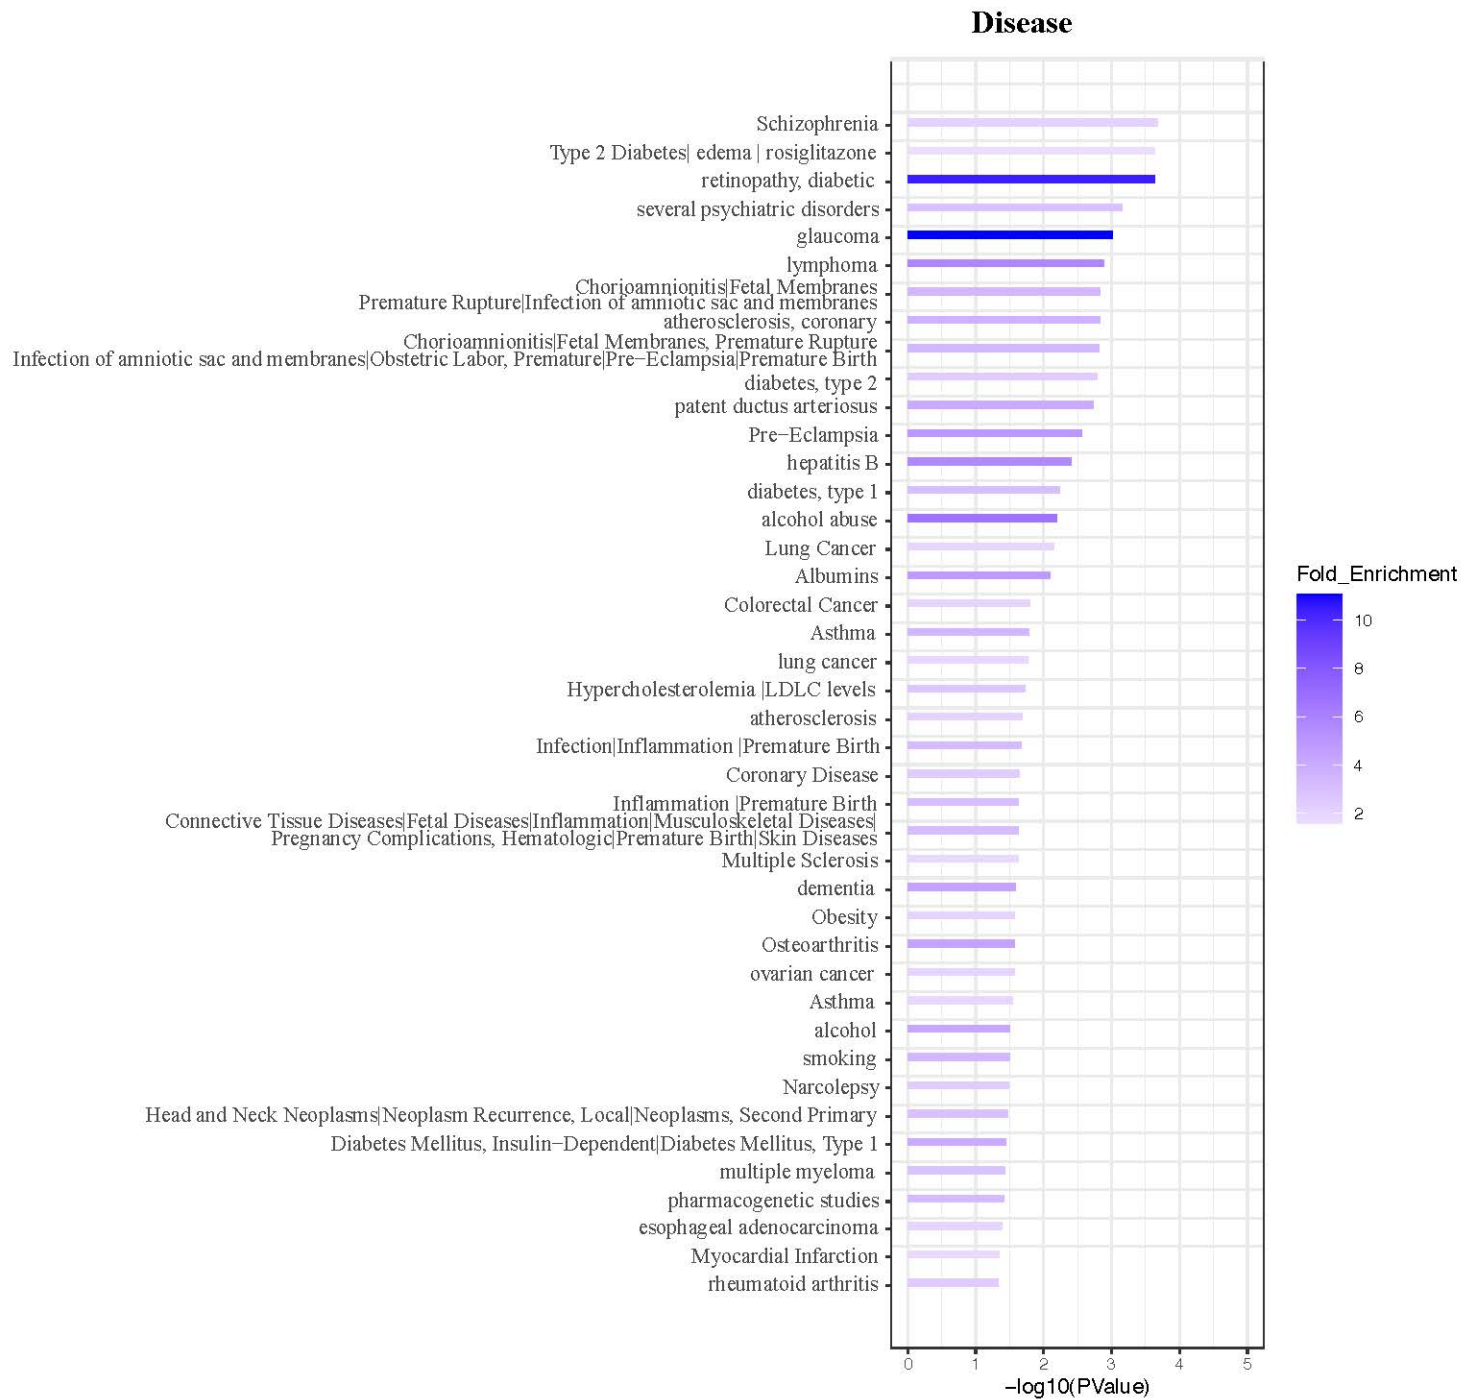

**Table S1. List of primer sequences**

| Gene Name                     | Application | Forward                | Reverse                 |
|-------------------------------|-------------|------------------------|-------------------------|
| TWY3                          | qPCR        | GGAGGAATAGTGGCTGTAGTTG | CTTCAGCTCCTTAGCTTCATTG  |
| CA7                           | qPCR        | AGAAGGCTGGATTGGAGTTATC | AATACGTGAGCCAACTCTACAA  |
| CRYZ                          | qPCR        | AAACCCACGAGACACCATG    | CAACCAGCCAATTTCCATTCC   |
| NEUROD1                       | qPCR        | G TTCAGGACCTCTTCCCATTG | AACCCAGATAGCAACATCCAC   |
| NEUROG1                       | qPCR        | GGAGCCTGTAAGGCCAATAA   | CATCTGTGATCCCGCTGTAA    |
| FLRT2                         | qPCR        | GGGCCACAGTTTAGTAGGG    | CACTAAACAAATCCGATAGGTGG |
| GABRQ                         | qPCR        | GGTTCCTACATACGCCTGATAC | CAAGAGGTAATAGTGGTGAGGAC |
| GAPDH                         | qPCR        | CCTCTGACTTCAACAGCGACAC | AGCCAAATTCGTTGTCATACCAG |
| NESTIN                        | qPCR        | TCCAGGAACGGAATAAATCAAG | GCCTCCTCATCCCCTACTTC    |
| NEUROG2                       | qPCR        | TTGCTCAAAGAACTCCAGGG   | TCTGCATGTAAGTCACCCAC    |
| PAX6                          | qPCR        | TGTCCAACGGATGTGTGAGT   | TTTCCCAAGCAAAGATGGAC    |
| NRK                           | qPCR        | AGCAGTGGCCAACAGTATC    | GGTTGCCTGGTCCGTATTTA    |
| FLRT1                         | qPCR        | CTTCAGGCCTCTCCAGATAAAG | GGGTTTGTTCAGGTCATAGGT   |
| NXPH3                         | qPCR        | TCGATCTCCCAGGCTCTTT    | GGCGGAGTTACGATGTATCC    |
| ROBO1                         | qPCR        | TCAGGGAAGGTGGTATGGAT   | GTATGCTCTGATGCCGTCTATG  |
| GRID1                         | qPCR        | AGGTCATCATCGAGGAGTCATA | GCTCACCGTAATTGCCTCTAA   |
| SNCA                          | qPCR        | GGAGTGGCCATTCGACGAC    | CCTGCTGCTTCTGCCACAC     |
| SYT7                          | qPCR        | TCTCCATCCTCAGCTGGGTGGC | CCGCTGCCCCACGGATAGC     |
| $\beta$ III-tubulin<br>(TUJ1) | qPCR        | CATTCTGGTGGACCTGGAAC   | CCTCCGTGTAGTGACCCTTG    |

Table S2. Global gene expression profiling

| Gene_Name | Ensembl_GeneID  | Gene_biotype   | Norm_Expr_CTR | Norm_Expr_PD | Fold Change | Log FC   | p-Value  | FDR      | Description                                                                                                    |
|-----------|-----------------|----------------|---------------|--------------|-------------|----------|----------|----------|----------------------------------------------------------------------------------------------------------------|
| TYW3      | ENSG00000162623 | protein_coding | 821,2679792   | 2,292202621  | 0.002791053 | -8,48497 | 5,56E-21 | 2,2E-16  | tRNA-yW synthesizing protein 3 homolog (S. cerevisiae) [Source:HGNC Symbol;Acc:24757]                          |
| CRYZ      | ENSG00000161791 | protein_coding | 2082,900517   | 23,66079145  | 0.011333614 | -6,46325 | 8,7E-18  | 1,72E-13 | crystallin, zeta (quinone reductase) [Source:HGNC Symbol;Acc:2419]                                             |
| PABPC4L   | ENSG00000254535 | protein_coding | 0,996597191   | 181,9964786  | 182,6178923 | 7,512684 | 8E-12    | 7,92E-08 | poly(A) binding protein, cytoplasmic 4-like [Source:HGNC Symbol;Acc:31955]                                     |
| PCDHA6    | ENSG00000081842 | protein_coding | 10,84352968   | 161,6453643  | 14,90708    | 3,897926 | 2,63E-07 | 0,000973 | protocadherin alpha 6 [Source:HGNC Symbol;Acc:8672]                                                            |
| ACTG2     | ENSG00000163017 | protein_coding | 1416,568899   | 148,921766   | 0,105128502 | -3,24977 | 2,7E-07  | 0,000973 | actin, gamma 2, smooth muscle, enteric [Source:HGNC Symbol;Acc:145]                                            |
| SST       | ENSG00000157005 | protein_coding | 93,22008073   | 716,3245039  | 7,684229602 | 2,941901 | 6,73E-06 | 0,01096  | somatostatin [Source:HGNC Symbol;Acc:11329]                                                                    |
| CDC33     | ENSG00000140481 | protein_coding | 3,239947276   | 60,92945008  | 18,80569185 | 4,233097 | 7,61E-06 | 0,020116 | colled-coil domain containing 33 [Source:HGNC Symbol;Acc:26552]                                                |
| ZNF619    | ENSG00000177873 | protein_coding | 3,239947276   | 60,52504058  | 18,68082707 | 4,22349  | 8,48E-06 | 0,020995 | zinc finger protein 619 [Source:HGNC Symbol;Acc:26910]                                                         |
| CYTL1     | ENSG00000170891 | protein_coding | 10,71845183   | 108,2772873  | 10,10195214 | 3,336562 | 1,57E-05 | 0,036643 | cytokine-like 1 [Source:HGNC Symbol;Acc:24435]                                                                 |
| CSorf17   | ENSG00000248874 | protein_coding | 0             | 26,42235701  | #N/A        | #N/A     | 1,81E-05 | 0,039672 | chromosome 5 open reading frame 17 [Source:HGNC Symbol;Acc:26630]                                              |
| PPP1R17   | ENSG00000106341 | protein_coding | 30,15813548   | 276,7568107  | 9,176854148 | 3,198    | 1,9E-05  | 0,039672 | protein phosphatase 1, regulatory subunit 17 [Source:HGNC Symbol;Acc:16973]                                    |
| ZNF572    | ENSG00000180938 | protein_coding | 19,56476151   | 0            | 0           | #N/A     | 7,07E-05 | 0,126278 | zinc finger protein 572 [Source:HGNC Symbol;Acc:26758]                                                         |
| PLN       | ENSG00000198523 | protein_coding | 154,5389873   | 24,19810477  | 0,156582525 | -2,675   | 7,31E-05 | 0,126278 | phospholamban [Source:HGNC Symbol;Acc:9080]                                                                    |
| CTHRC1    | ENSG00000164932 | protein_coding | 115,6636456   | 11,77707099  | 0,101821717 | -3,29588 | 7,33E-05 | 0,126278 | collagen triple helix repeat containing 1 [Source:HGNC Symbol;Acc:18831]                                       |
| TAGLN     | ENSG00000149591 | protein_coding | 8540,571183   | 1643,764133  | 0,192465363 | -2,37733 | 7,89E-05 | 0,130341 | transgelin [Source:HGNC Symbol;Acc:11553]                                                                      |
| RPL9      | ENSG00000163682 | protein_coding | 635,4934631   | 3410,007919  | 5,365921314 | 2,423826 | 9,79E-05 | 0,149146 | ribosomal protein L9 [Source:HGNC Symbol;Acc:10369]                                                            |
| ITGA2B    | ENSG00000005961 | protein_coding | 59,30759693   | 335,7542113  | 5,661234457 | 2,501117 | 0,000263 | 0,325869 | integrin, alpha 2b (platelet glycoprotein IIb of IIb/IIIa complex, antigen CD41) [Source:HGNC Symbol;Acc:6138] |
| COMT      | ENSG00000093010 | protein_coding | 85,136315     | 755,4212636  | 8,873079174 | 3,149435 | 0,000335 | 0,390612 | catechol-O-methyltransferase [Source:HGNC Symbol;Acc:2228]                                                     |
| SLC25A41  | ENSG00000181240 | protein_coding | 12,59059397   | 79,67148054  | 6,327857186 | 2,661717 | 0,00037  | 0,418456 | solute carrier family 25, member 41 [Source:HGNC Symbol;Acc:28533]                                             |
| THEM6     | ENSG00000130193 | protein_coding | 49,35571466   | 249,3454775  | 5,052008248 | 2,336857 | 0,000384 | 0,422398 | thioesterase superfamily member 6 [Source:HGNC Symbol;Acc:29656]                                               |
| NOTUM     | ENSG00000185269 | protein_coding | 25,92159101   | 145,678097   | 5,619951989 | 2,490558 | 0,000402 | 0,431068 | notum pectinacetylase homolog (Drosophila) [Source:HGNC Symbol;Acc:27106]                                      |
| ART5      | ENSG00000167311 | protein_coding | 16,69602217   | 108,3656389  | 6,490506413 | 2,698331 | 0,000426 | 0,43118  | ADP-ribosyltransferase 5 [Source:HGNC Symbol;Acc:24049]                                                        |
| YBX2      | ENSG00000006047 | protein_coding | 50,34023501   | 259,1464038  | 5,147898172 | 2,363984 | 0,000508 | 0,47714  | Y box binding protein 2 [Source:HGNC Symbol;Acc:17948]                                                         |
| ARL17B    | ENSG00000228696 | protein_coding | 7,228348849   | 56,13773978  | 7,766329622 | 2,957233 | 0,000518 | 0,47714  | ADP-ribosylation factor-like 17B [Source:HGNC Symbol;Acc:32387]                                                |
| TMEM132E  | ENSG00000181291 | protein_coding | 72,65067081   | 336,8825421  | 4,637019016 | 2,213198 | 0,000679 | 0,61087  | transmembrane protein 132E [Source:HGNC Symbol;Acc:26991]                                                      |
| ACTA2     | ENSG00000107796 | protein_coding | 2575,820481   | 640,9858077  | 0,248847259 | -2,00667 | 0,00079  | 0,679576 | actin, alpha 2, smooth muscle, aorta [Source:HGNC Symbol;Acc:130]                                              |
| SPP1      | ENSG00000118785 | protein_coding | 4791,316164   | 1161,146067  | 0,242343863 | -2,04487 | 0,000806 | 0,679576 | secreted phosphoprotein 1 [Source:HGNC Symbol;Acc:11255]                                                       |
| TNFRSF18  | ENSG00000028137 | protein_coding | 28,54017465   | 138,2934271  | 4,845570456 | 2,276667 | 0,00104  | 0,840968 | tumor necrosis factor receptor superfamily, member 18 [Source:HGNC Symbol;Acc:11917]                           |
| TNC       | ENSG00000041982 | protein_coding | 9705,32392    | 2549,610142  | 0,26270222  | -1,9285  | 0,00104  | 0,840968 | tenascin C [Source:HGNC Symbol;Acc:5318]                                                                       |
| GPR50     | ENSG00000102195 | protein_coding | 190,8158734   | 43,04378777  | 0,225577605 | -2,1483  | 0,001153 | 0,885745 | G protein-coupled receptor 50 [Source:HGNC Symbol;Acc:4506]                                                    |
| DCDC2     | ENSG00000146038 | protein_coding | 31,53197903   | 149,6252861  | 4,74519173  | 2,246466 | 0,001158 | 0,885745 | doublecortin domain containing 2 [Source:HGNC Symbol;Acc:18141]                                                |
| LY6H      | ENSG00000176956 | protein_coding | 88,2431332    | 362,066169   | 4,103052055 | 2,036697 | 0,001162 | 0,885745 | lymphocyte antigen 6 complex, locus H [Source:HGNC Symbol;Acc:6728]                                            |
| PTGR1     | ENSG00000106853 | protein_coding | 1098,098009   | 283,0131498  | 0,257730319 | -1,95607 | 0,001217 | 0,909592 | prostaglandin reductase 1 [Source:HGNC Symbol;Acc:18429]                                                       |
| ZP3       | ENSG00000188372 | protein_coding | 43,1219502    | 5,683780594  | 0,131807132 | -2,9235  | 0,001263 | 0,92647  | zona pellucida glycoprotein 3 (sperm receptor) [Source:HGNC Symbol;Acc:13189]                                  |
| CRHR1     | ENSG00000120088 | protein_coding | 8,723244636   | 55,45297454  | 6,356920716 | 2,668328 | 0,001354 | 0,957774 | corticotropin releasing hormone receptor 1 [Source:HGNC Symbol;Acc:2357]                                       |
| TMEM121   | ENSG00000184986 | protein_coding | 9,350646696   | 53,04691878  | 5,673074869 | 2,504131 | 0,001448 | 1        | transmembrane protein 121 [Source:HGNC Symbol;Acc:20511]                                                       |
| CST1      | ENSG00000170373 | protein_coding | 42,37550871   | 185,1909521  | 4,370235491 | 2,127711 | 0,001622 | 1        | cystatin SN [Source:HGNC Symbol;Acc:2473]                                                                      |
| TULP1     | ENSG00000112041 | protein_coding | 10,71643902   | 69,51714785  | 6,486963414 | 2,697543 | 0,00165  | 1        | tubby like protein 1 [Source:HGNC Symbol;Acc:12423]                                                            |
| LRRCS3    | ENSG00000162621 | protein_coding | 2,74164868    | 27,82758964  | 10,14994731 | 3,3434   | 0,001924 | 1        | leucine rich repeat containing 53 [Source:HGNC Symbol;Acc:25255]                                               |
| ATP2B2    | ENSG00000157087 | protein_coding | 9,721854634   | 116,2057214  | 11,95304042 | 3,579306 | 0,001926 | 1        | ATPase, Ca++ transporting, plasma membrane 2 [Source:HGNC Symbol;Acc:815]                                      |
| LGI4      | ENSG00000153902 | protein_coding | 104,4187159   | 420,9413234  | 4,031282321 | 2,011239 | 0,001981 | 1        | leucine-rich repeat LGI family, member 4 [Source:HGNC Symbol;Acc:18712]                                        |
| TM6IM4    | ENSG00000155957 | protein_coding | 73,05609647   | 264,0944161  | 3,614953835 | 1,853977 | 0,002136 | 1        | transmembrane BAX inhibitor motif containing 4 [Source:HGNC Symbol;Acc:24257]                                  |
| INTRK1    | ENSG00000198400 | protein_coding | 31,65504407   | 136,3172823  | 4,306336836 | 2,106461 | 0,002167 | 1        | neurotrophic tyrosine kinase, receptor, type 1 [Source:HGNC Symbol;Acc:8031]                                   |
| LILRA6    | ENSG00000244482 | protein_coding | 60,82463359   | 8,774601598  | 0,144260657 | -2,79325 | 0,002242 | 1        | leukocyte immunoglobulin-like receptor, subfamily A (with TM domain), member 6 [Source:HGNC Symbol;Acc:15495]  |
| AGPAT9    | ENSG00000138678 | protein_coding | 76,88922808   | 16,83893642  | 0,219002542 | -2,19098 | 0,002343 | 1        | 1-acylglycerol-3-phosphate O-acyltransferase 9 [Source:HGNC Symbol;Acc:28157]                                  |
| POU4F1    | ENSG00000152192 | protein_coding | 134,0886168   | 505,7307727  | 3,771616001 | 1,915183 | 0,002347 | 1        | POU class 4 homeobox 1 [Source:HGNC Symbol;Acc:9218]                                                           |
| FOXN4     | ENSG00000139445 | protein_coding | 12,09028257   | 61,9251729   | 5,121896246 | 2,356678 | 0,002379 | 1        | forkhead box N4 [Source:HGNC Symbol;Acc:21399]                                                                 |
| PALMD     | ENSG00000099260 | protein_coding | 106,8012335   | 25,80044185  | 0,241574381 | -2,04946 | 0,00238  | 1        | palmdelphin [Source:HGNC Symbol;Acc:15846]                                                                     |
| ZFR2      | ENSG00000105278 | protein_coding | 70,41134634   | 278,9555614  | 3,96179843  | 1,986155 | 0,002385 | 1        | zinc finger RNA binding protein 2 [Source:HGNC Symbol;Acc:29189]                                               |
| ALOX15B   | ENSG00000179593 | protein_coding | 41,49392533   | 3,785786858  | 0,091237135 | -3,45424 | 0,002392 | 1        | arachidonate 15-lipoxygenase, type B [Source:HGNC Symbol;Acc:434]                                              |
| CRIP3     | ENSG00000146215 | protein_coding | 8,84630968    | 54,22444512  | 6,129611905 | 2,615796 | 0,002701 | 1        | cysteine-rich protein 3 [Source:HGNC Symbol;Acc:17751]                                                         |
| NEUROD1   | ENSG00000162992 | protein_coding | 30,91061539   | 255,4473221  | 8,264064591 | 3,046852 | 0,00271  | 1        | neuronal differentiation 1 [Source:HGNC Symbol;Acc:7762]                                                       |
| C8orf31   | ENSG00000177335 | protein_coding | 8,602192399   | 45,77610203  | 5,321445965 | 2,411818 | 0,002753 | 1        | chromosome 8 open reading frame 31 [Source:HGNC Symbol;Acc:26731]                                              |
| RBP2D     | ENSG00000185304 | protein_coding | 19,55872308   | 98,20110564  | 5,020834193 | 2,327927 | 0,002821 | 1        | RANBP2-like and GRIP domain containing 2 [Source:HGNC Symbol;Acc:32415]                                        |
| NNMT      | ENSG00000166741 | protein_coding | 616,326598    | 130,7863498  | 0,212203077 | -2,23648 | 0,003097 | 1        | nicotinamide N-methyltransferase [Source:HGNC Symbol;Acc:7861]                                                 |
| IAH1      | ENSG00000134330 | protein_coding | 74,30083655   | 488,0354682  | 5,668371109 | 2,715536 | 0,003128 | 1        | isoamyl acetate-hydrolyzing esterase 1 homolog (S. cerevisiae) [Source:HGNC Symbol;Acc:27696]                  |
| CDC20B    | ENSG00000164287 | protein_coding | 30,90256416   | 135,3589081  | 4,380183707 | 2,130991 | 0,003179 | 1        | cell division cycle 20B [Source:HGNC Symbol;Acc:24222]                                                         |
| ITGA11    | ENSG00000137809 | protein_coding | 339,1878027   | 68,94788214  | 0,203273471 | -2,29851 | 0,003397 | 1        | integrin, alpha 11 [Source:HGNC Symbol;Acc:6136]                                                               |
| EBF4      | ENSG00000088881 | protein_coding | 143,074094    | 488,8918363  | 3,417053519 | 1,727253 | 0,003847 | 1        | early B-cell factor 4 [Source:HGNC Symbol;Acc:29278]                                                           |
| SAMSN1    | ENSG00000155307 | protein_coding | 1,494895787   | 20,44291976  | 13,67514708 | 3,773484 | 0,003892 | 1        | SAM domain, SH3 domain and nuclear localization signals 1 [Source:HGNC Symbol;Acc:10528]                       |
| HLA-DOA   | ENSG00000204252 | protein_coding | 26,42190242   | 107,2866648  | 4,060520062 | 2,021665 | 0,003947 | 1        | major histocompatibility complex, class II, DO alpha [Source:HGNC Symbol;Acc:4936]                             |
| UPK1B     | ENSG00000114638 | protein_coding | 47,85880607   | 9,267362704  | 0,193639655 | -2,36855 | 0,004127 | 1        | uroplakin 1B [Source:HGNC Symbol;Acc:12578]                                                                    |
| SLFN12    | ENSG00000172123 | protein_coding | 92,09438008   | 22,72492176  | 0,246756879 | -2,01884 | 0,004173 | 1        | schlafen family member 12 [Source:HGNC Symbol;Acc:25500]                                                       |
| HLA-DQB1  | ENSG00000179344 | protein_coding | 2,368427935   | 22,53291763  | 9,513870908 | 3,250032 | 0,004315 | 1        | major histocompatibility complex, class II, DQ beta 1 [Source:HGNC Symbol;Acc:4944]                            |
| OSGIN1    | ENSG00000140961 | protein_coding | 113,7814394   | 26,74351521  | 0,235042862 | -2,089   | 0,004523 | 1        | oxidative stress induced growth inhibitor 1 [Source:HGNC Symbol;Acc:30093]                                     |
| GFR2A     | ENSG00000168546 | protein_coding | 96,33897577   | 352,9636625  | 3,663768062 | 1,873328 | 0,004646 | 1        | GNF family receptor alpha 2 [Source:HGNC Symbol;Acc:4244]                                                      |
| TLR5      | ENSG00000187554 | protein_coding | 8,848322486   | 45,57389728  | 5,150569201 | 2,364732 | 0,005252 | 1        | toll-like receptor 5 [Source:HGNC Symbol;Acc:11851]                                                            |
| LDHD      | ENSG00000166816 | protein_coding | 9,344608275   | 50,54231079  | 5,408713699 | 2,435286 | 0,005267 | 1        | lactate dehydrogenase D [Source:HGNC Symbol;Acc:19708]                                                         |
| COL11A2   | ENSG00000204248 | protein_coding | 461,309202    | 2821,636411  | 6,116583841 | 2,612726 | 0,005392 | 1        | collagen, type XI, alpha 2 [Source:HGNC Symbol;Acc:2187]                                                       |
| CA7       | ENSG00000168748 | protein_coding | 0,996597191   | 17,24334592  | 17,30222207 | 4,112885 | 0,005405 | 1        | carbonic anhydrase VII [Source:HGNC Symbol;Acc:1381]                                                           |
| CTD19     | ENSG00000168676 | protein_coding | 9,469686126   | 87,67806559  | 9,258814329 | 3,210827 | 0,005415 | 1        | potassium channel tetramerization domain containing 19 [Source:HGNC Symbol;Acc:24753]                          |
| RPS28     | ENSG00000233927 | protein_coding | 544,9969158   | 161,5213106  | 0,296371054 | -1,75452 | 0,005434 | 1        | ribosomal protein S28 [Source:HGNC Symbol;Acc:10418]                                                           |



|           |                 |                |             |              |             |          |          |   |                                                                                                                     |
|-----------|-----------------|----------------|-------------|--------------|-------------|----------|----------|---|---------------------------------------------------------------------------------------------------------------------|
| OR2W3     | ENSG00000238243 | protein_coding | 9,594763977 | 0            | 0           | #N/A     | 0,005458 | 1 | olfactory receptor, family 2, subfamily W, member 3 [Source:HGNC Symbol;Acc:15021]                                  |
| KCNH6     | ENSG00000173826 | protein_coding | 3,239947276 | 25,62883894  | 7,910264198 | 2,983726 | 0,005683 | 1 | potassium voltage-gated channel, subfamily H (eag-related), member 6 [Source:HGNC Symbol;Acc:18862]                 |
| KCNK5     | ENSG00000164626 | protein_coding | 169,3306624 | 581,2018563  | 3,432348566 | 1,779196 | 0,005808 | 1 | potassium channel, subfamily K, member 5 [Source:HGNC Symbol;Acc:6280]                                              |
| ENDOD1    | ENSG00000149218 | protein_coding | 1614,619444 | 539,0991733  | 0,333886214 | -1,58257 | 0,005891 | 1 | endonuclease domain containing 1 [Source:HGNC Symbol;Acc:29129]                                                     |
| ATP2A3    | ENSG00000074370 | protein_coding | 27,41849961 | 207,6746491  | 7,574253775 | 2,921104 | 0,005996 | 1 | ATPase, Ca++ transporting, ubiquitous [Source:HGNC Symbol;Acc:813]                                                  |
| C20orf195 | ENSG00000125531 | protein_coding | 9,471698933 | 45,97830678  | 4,854282965 | 2,279258 | 0,006101 | 1 | chromosome 20 open reading frame 195 [Source:HGNC Symbol;Acc:28764]                                                 |
| CCDC88B   | ENSG00000168071 | protein_coding | 122,8738792 | 405,1083104  | 3,296944095 | 1,721129 | 0,006145 | 1 | coiled-coil domain containing 88B [Source:HGNC Symbol;Acc:26757]                                                    |
| FGF19     | ENSG00000162344 | protein_coding | 30,91061539 | 110,8906482  | 3,587461678 | 1,842963 | 0,006426 | 1 | fibroblast growth factor 19 [Source:HGNC Symbol;Acc:3675]                                                           |
| ADM       | ENSG00000148926 | protein_coding | 531,2058635 | 160,2468784  | 0,301666245 | -1,72897 | 0,006712 | 1 | adrenomedullin [Source:HGNC Symbol;Acc:259]                                                                         |
| HRC       | ENSG00000130528 | protein_coding | 32,89771735 | 122,0662052  | 3,710470351 | 1,891602 | 0,006751 | 1 | histidine rich calcium binding protein [Source:HGNC Symbol;Acc:5178]                                                |
| DNAH2     | ENSG00000183914 | protein_coding | 104,4348183 | 347,3290775  | 3,325797689 | 1,7337   | 0,006786 | 1 | dynein, axonemal, heavy chain 2 [Source:HGNC Symbol;Acc:2948]                                                       |
| MS4A8     | ENSG00000166959 | protein_coding | 5,981595956 | 34,79764942  | 5,817452345 | 2,540387 | 0,006891 | 1 | membrane-spanning 4-domains, subfamily A, member 8 [Source:HGNC Symbol;Acc:13380]                                   |
| PRDM12    | ENSG00000130711 | protein_coding | 58,69227171 | 363,4697553  | 6,192804345 | 2,630593 | 0,006995 | 1 | PR domain containing 12 [Source:HGNC Symbol;Acc:13997]                                                              |
| PDIA2     | ENSG00000185615 | protein_coding | 9,346621082 | 50,8685693   | 5,442455498 | 2,444258 | 0,007146 | 1 | protein disulfide isomerase family A, member 2 [Source:HGNC Symbol;Acc:14180]                                       |
| MYOCD     | ENSG00000141052 | protein_coding | 109,554959  | 30,29139517  | 0,276494971 | -1,85467 | 0,007181 | 1 | myocardin [Source:HGNC Symbol;Acc:16067]                                                                            |
| BEST3     | ENSG00000127325 | protein_coding | 21,18473514 | 2,790064033  | 0,131701625 | -2,92465 | 0,007235 | 1 | bestrophin 3 [Source:HGNC Symbol;Acc:17105]                                                                         |
| MLXIPL    | ENSG00000009950 | protein_coding | 19,31661861 | 78,94081254  | 4,086678633 | 2,030929 | 0,007332 | 1 | MLX interacting protein-like [Source:HGNC Symbol;Acc:12744]                                                         |
| NELL1     | ENSG00000165973 | protein_coding | 742,8254839 | 243,1536439  | 0,327336151 | -1,61116 | 0,007379 | 1 | NEL-like 1 (chicken) [Source:HGNC Symbol;Acc:7750]                                                                  |
| ABCC6     | ENSG00000091262 | protein_coding | 68,78533428 | 241,3966422  | 3,50942021  | 1,811233 | 0,007689 | 1 | ATP-binding cassette, sub-family C (CFTR/MRP), member 6 [Source:HGNC Symbol;Acc:57]                                 |
| CALB1     | ENSG00000140327 | protein_coding | 314,4603478 | 97,56388955  | 0,310258162 | -1,68846 | 0,007929 | 1 | calbindin 1, 28kDa [Source:HGNC Symbol;Acc:1434]                                                                    |
| RASL12    | ENSG00000103710 | protein_coding | 23,42204681 | 96,40166413  | 4,115851399 | 2,041191 | 0,007972 | 1 | RAS-like, family 12 [Source:HGNC Symbol;Acc:30289]                                                                  |
| GLIPR1    | ENSG00000139278 | protein_coding | 889,1996256 | 153,5928765  | 0,172731603 | -2,5334  | 0,008094 | 1 | GLI pathogenesis-related 1 [Source:HGNC Symbol;Acc:17001]                                                           |
| F2RL2     | ENSG00000164220 | protein_coding | 315,0716474 | 99,75243965  | 0,3166024   | -1,65926 | 0,008133 | 1 | coagulation factor II (thrombin) receptor-like 2 [Source:HGNC Symbol;Acc:3539]                                      |
| RAB26     | ENSG00000167964 | protein_coding | 39,74887384 | 141,7156069  | 3,565273508 | 1,834013 | 0,008182 | 1 | RAB26, member RAS oncogene family [Source:HGNC Symbol;Acc:14259]                                                    |
| SYNM      | ENSG00000182253 | protein_coding | 265,7219712 | 79,66127993  | 0,299791845 | -1,73797 | 0,00832  | 1 | synemin, intermediate filament protein [Source:HGNC Symbol;Acc:24466]                                               |
| HLA-DPB1  | ENSG00000223865 | protein_coding | 69,54586542 | 222,0565518  | 3,192951161 | 1,67489  | 0,008426 | 1 | major histocompatibility complex, class II, DP beta 1 [Source:HGNC Symbol;Acc:4940]                                 |
| PXMP4     | ENSG00000101417 | protein_coding | 41,0367796  | 9,459366839  | 0,230695569 | -2,11594 | 0,008588 | 1 | peroxisomal membrane protein 4, 24kDa [Source:HGNC Symbol;Acc:15920]                                                |
| HEYL      | ENSG00000163909 | protein_coding | 135,815553  | 440,3528182  | 3,242285646 | 1,697011 | 0,009113 | 1 | hairly/enhancer-of-split related with YRPW motif-like [Source:HGNC Symbol;Acc:4882]                                 |
| CALN1     | ENSG00000183166 | protein_coding | 11,21876323 | 62,7390922   | 5,592335887 | 2,483451 | 0,00912  | 1 | calneuron 1 [Source:HGNC Symbol;Acc:13248]                                                                          |
| CBAF2A3   | ENSG00000129993 | protein_coding | 30,16014829 | 105,0046628  | 3,481569846 | 1,799738 | 0,009302 | 1 | core-binding factor, runt domain, alpha subunit 2; translocated to, 3 [Source:HGNC Symbol;Acc:1537]                 |
| TCHH      | ENSG00000159450 | protein_coding | 0           | 19,2551928   | #N/A        | #N/A     | 0,009456 | 1 | trichohyalin [Source:HGNC Symbol;Acc:11791]                                                                         |
| TNFRSF12A | ENSG00000006327 | protein_coding | 1417,776841 | 377,8345244  | 0,266497881 | -1,9078  | 0,00952  | 1 | tumor necrosis factor receptor superfamily, member 12A [Source:HGNC Symbol;Acc:18152]                               |
| NRAA1     | ENSG00000123358 | protein_coding | 312,965452  | 893,3119276  | 2,854346772 | 1,513161 | 0,010215 | 1 | nuclear receptor subfamily 4, group A, member 1 [Source:HGNC Symbol;Acc:7980]                                       |
| SMIM17    | ENSG00000268182 | protein_coding | 4,982985957 | 38,00232356  | 7,626415946 | 2,931005 | 0,01024  | 1 | small integral membrane protein 17 [Source:HGNC Symbol;Acc:27114]                                                   |
| VWDE      | ENSG00000146530 | protein_coding | 36,75908227 | 130,001386   | 3,536578662 | 1,822354 | 0,010341 | 1 | von Willebrand factor D and EGF domains [Source:HGNC Symbol;Acc:21897]                                              |
| TNFAIP8L3 | ENSG00000183578 | protein_coding | 23,0588901  | 3,386477667  | 0,146862128 | -2,76747 | 0,010462 | 1 | tumor necrosis factor, alpha-induced protein 8-like 3 [Source:HGNC Symbol;Acc:20620]                                |
| GABRRQ    | ENSG00000147402 | protein_coding | 24,29960457 | 90,56158154  | 3,726874702 | 1,897966 | 0,010639 | 1 | gamma-aminobutyric acid (GABA) A receptor, theta [Source:HGNC Symbol;Acc:14454]                                     |
| CAV1      | ENSG00000105974 | protein_coding | 983,4588563 | 343,5618844  | 0,349340374 | -1,51729 | 0,010657 | 1 | caveolin 1, caveolae protein, 22kDa [Source:HGNC Symbol;Acc:1527]                                                   |
| FLT1      | ENSG00000102755 | protein_coding | 1157,207783 | 426,2697289  | 0,368360579 | -1,44081 | 0,010694 | 1 | fms-related tyrosine kinase 1 [Source:HGNC Symbol;Acc:3763]                                                         |
| USH1C     | ENSG00000006611 | protein_coding | 17,32141142 | 67,50530097  | 3,897217111 | 1,962444 | 0,010726 | 1 | Usher syndrome 1C (autosomal recessive, severe) [Source:HGNC Symbol;Acc:12597]                                      |
| PDYN      | ENSG00000101327 | protein_coding | 19,93798225 | 75,19072783  | 3,771230553 | 1,915035 | 0,010761 | 1 | prodynorphin [Source:HGNC Symbol;Acc:8820]                                                                          |
| C17orf102 | ENSG00000197322 | protein_coding | 1,619973638 | 16,6571329   | 10,28234812 | 3,362098 | 0,0109   | 1 | chromosome 17 open reading frame 102 [Source:HGNC Symbol;Acc:34412]                                                 |
| LAMC2     | ENSG00000058085 | protein_coding | 598,6052774 | 207,8444696  | 0,347214563 | -1,5261  | 0,011049 | 1 | laminin, gamma 2 [Source:HGNC Symbol;Acc:6493]                                                                      |
| CD164L2   | ENSG00000174950 | protein_coding | 1,246752893 | 14,75403886  | 11,83397202 | 3,564862 | 0,011082 | 1 | CD164 salomucin-like 2 [Source:HGNC Symbol;Acc:32043]                                                               |
| COLCA2    | ENSG00000214290 | protein_coding | 6,730050253 | 33,30916549  | 4,949318985 | 2,30723  | 0,011083 | 1 | colorectal cancer associated 2 [Source:HGNC Symbol;Acc:26978]                                                       |
| GBP1      | ENSG00000117228 | protein_coding | 147,0403547 | 42,04806494  | 0,285962755 | -1,8061  | 0,011256 | 1 | guanylate binding protein 1, interferon-inducible [Source:HGNC Symbol;Acc:4182]                                     |
| CDK18     | ENSG00000117266 | protein_coding | 299,0415545 | 926,085722   | 3,096846268 | 1,6308   | 0,011759 | 1 | cyclin-dependent kinase 18 [Source:HGNC Symbol;Acc:8751]                                                            |
| CADM2     | ENSG00000175161 | protein_coding | 83,61726553 | 257,4761163  | 3,079221913 | 1,622566 | 0,012165 | 1 | cell adhesion molecule 2 [Source:HGNC Symbol;Acc:29849]                                                             |
| FGF1      | ENSG00000113578 | protein_coding | 45,6194816  | 6,881708168  | 0,150850205 | -2,72881 | 0,012741 | 1 | fibroblast growth factor 1 (acidic) [Source:HGNC Symbol;Acc:3665]                                                   |
| INHBA     | ENSG00000122641 | protein_coding | 275,6899559 | 95,44328984  | 0,346197922 | -1,53033 | 0,013133 | 1 | inhibin, beta A [Source:HGNC Symbol;Acc:6066]                                                                       |
| CDHR2     | ENSG00000074276 | protein_coding | 23,55517588 | 79,48967702  | 3,374616153 | 1,754723 | 0,013319 | 1 | cadherin-related family member 2 [Source:HGNC Symbol;Acc:18231]                                                     |
| ZNF280D   | ENSG00000137871 | protein_coding | 220,1369911 | 1054,814644  | 4,791628336 | 2,260516 | 0,013341 | 1 | zinc finger protein 280D [Source:HGNC Symbol;Acc:25953]                                                             |
| NBPF14    | ENSG00000122497 | protein_coding | 221,3391784 | 628,9914516  | 2,841753801 | 1,506782 | 0,013393 | 1 | neuroblastoma breakpoint family, member 14 [Source:HGNC Symbol;Acc:25232]                                           |
| MAP3K7CL  | ENSG00000156265 | protein_coding | 82,8587472  | 5,180818875  | 0,062525914 | -3,9994  | 0,013714 | 1 | MAP3K7 C-terminal like [Source:HGNC Symbol;Acc:16457]                                                               |
| POLR2J3   | ENSG00000168255 | protein_coding | 102,4375984 | 31,50462367  | 0,307549417 | -1,70111 | 0,013778 | 1 | polymerase (RNA) II (DNA directed) polypeptide J3 [Source:HGNC Symbol;Acc:33853]                                    |
| ADAM11    | ENSG00000073670 | protein_coding | 196,3052092 | 724,6167061  | 3,691275993 | 1,88412  | 0,013908 | 1 | ADAM metalloproteinase domain 11 [Source:HGNC Symbol;Acc:189]                                                       |
| SGSM2     | ENSG00000164023 | protein_coding | 262,8149885 | 93,48754634  | 0,35571619  | -1,4912  | 0,014495 | 1 | sphingomyelin synthase 2 [Source:HGNC Symbol;Acc:28395]                                                             |
| PTGS1     | ENSG00000095303 | protein_coding | 39,8759645  | 132,0760829  | 3,312172748 | 1,727778 | 0,014517 | 1 | prostaglandin-endoperoxide synthase 1 (prostaglandin G/H synthase and cyclooxygenase) [Source:HGNC Symbol;Acc:9604] |
| NQO1      | ENSG00000181019 | protein_coding | 3876,147234 | 1076,193891  | 0,277645256 | -1,84869 | 0,01461  | 1 | NAD(P)H dehydrogenase, quinone 1 [Source:HGNC Symbol;Acc:2874]                                                      |
| ADAMTS4   | ENSG00000158859 | protein_coding | 70,41134634 | 234,0868306  | 3,324561207 | 1,733164 | 0,014936 | 1 | ADAM metalloproteinase with thrombospondin type 1 motif, 4 [Source:HGNC Symbol;Acc:220]                             |
| SYT7      | ENSG00000111347 | protein_coding | 153,4173123 | 437,9637097  | 2,854721565 | 1,51335  | 0,015105 | 1 | synaptotagmin VII [Source:HGNC Symbol;Acc:11514]                                                                    |
| KIAA1456  | ENSG00000250305 | protein_coding | 288,9827096 | 820,3828005  | 2,838864656 | 1,505314 | 0,015214 | 1 | KIAA1456 [Source:HGNC Symbol;Acc:26725]                                                                             |
| WDR86     | ENSG00000187260 | protein_coding | 172,6936747 | 529,8913678  | 3,068388976 | 1,617481 | 0,015257 | 1 | WD repeat domain 86 [Source:HGNC Symbol;Acc:28020]                                                                  |
| CD8B      | ENSG00000172116 | protein_coding | 2,243350084 | 17,84485986  | 7,954558668 | 2,991782 | 0,015555 | 1 | CD8b molecule [Source:HGNC Symbol;Acc:1707]                                                                         |
| RNF144B   | ENSG00000137393 | protein_coding | 68,42821599 | 15,85341421  | 0,23167949  | -2,1098  | 0,015585 | 1 | ring finger protein 144B [Source:HGNC Symbol;Acc:21578]                                                             |
| KCNQ1     | ENSG00000053918 | protein_coding | 12,83269845 | 52,7461681   | 4,110293874 | 2,039242 | 0,015587 | 1 | potassium voltage-gated channel, KQT-like subfamily, member 1 [Source:HGNC Symbol;Acc:6294]                         |
| CAMK1G    | ENSG00000008118 | protein_coding | 72,39045107 | 232,248233   | 3,208271665 | 1,681796 | 0,015597 | 1 | calcium/calmodulin-dependent protein kinase IG [Source:HGNC Symbol;Acc:14585]                                       |
| ERAP2     | ENSG00000164308 | protein_coding | 67,29043849 | 21,12258469  | 0,313901725 | -1,67162 | 0,015796 | 1 | endoplasmic reticulum aminopeptidase 2 [Source:HGNC Symbol;Acc:29499]                                               |
| SELV      | ENSG00000186838 | protein_coding | 12,08826976 | 46,47616819  | 3,844732878 | 1,942883 | 0,016689 | 1 | Selenoprotein V [Source:UniProtKB/Swiss-Prot;Acc:P59797]                                                            |
| ATG16L2   | ENSG00000168010 | protein_coding | 269,3109855 | 745,4214254  | 2,767883471 | 1,468783 | 0,016745 | 1 | autophagy related 16-like 2 (S. cerevisiae) [Source:HGNC Symbol;Acc:25464]                                          |
| EYA2      | ENSG00000064655 | protein_coding | 79,77406988 | 263,5065567  | 3,303160502 | 1,723847 | 0,016748 | 1 | eyes absent homolog 2 (Drosophila) [Source:HGNC Symbol;Acc:3520]                                                    |
| OAS3      | ENSG00000111331 | protein_coding | 8,350023891 | 35,99557699  | 4,31083521  | 2,107967 | 0,016881 | 1 | 2'-5'-oligoadenylate synthetase 3, 100kDa [Source:HGNC Symbol;Acc:8088]                                             |
| HYAL1     | ENSG00000114378 | protein_coding | 34,80996574 | 116,606677   | 3,342030653 | 1,740725 | 0,017292 | 1 | hyaluronoglucosaminidase 1 [Source:HGNC Symbol;Acc:5320]                                                            |
| NEUROG1   | ENSG00000181965 | protein_coding | 27,91881101 | 225,24937899 | 0,068014745 | 3,012214 | 0,017308 | 1 | neurogenin 1 [Source:HGNC Symbol;Acc:7764]                                                                          |
| IGLON5    | ENSG00000142549 | protein_coding | 531,2967236 | 1920,035735  | 3,613867072 | 1,853543 | 0,017397 | 1 | IgLO family member 5 [Source:HGNC Symbol;Acc:34550]                                                                 |
| ADAMTS16  | ENSG00000145536 | protein_coding | 156,4091166 | 50,66126424  | 0,323902246 | -1,62637 | 0,017423 | 1 | ADAM metalloproteinase with thrombospondin type 1 motif, 16 [Source:HGNC Symbol;Acc:17108]                          |
| GCLM      | ENSG00000023909 | protein_coding | 1093,462077 | 413,1453362  | 0,377832341 | -1,40418 | 0,017963 | 1 | glutamate-cysteine ligase, modifier subunit [Source:HGNC Symbol;Acc:4312]                                           |
| PDUM3     | ENSG00000154553 | protein_coding | 380,4010964 | 117,1198393  | 0,307885126 | -1,69954 | 0,017972 | 1 | PDZ and LIM domain 3 [Source:HGNC Symbol;Acc:20767]                                                                 |
| TLX2      | ENSG00000115297 | protein_coding | 14,58378835 | 51,83369028  | 3,554199295 | 1,829525 | 0,018218 | 1 | T-cell leukemia homeobox 2 [Source:HGNC Symbol;Acc:5057]                                                            |
| GRIK4     | ENSG00000149403 | protein_coding | 26,9181882  | 87,34160648  | 3,244705989 | 1,698088 | 0,018436 | 1 | glutamate receptor, ionotropic, kainate 4 [Source:HGNC Symbol;Acc:4582]                                             |

|              |                  |                |             |             |             |          |          |   |                                                                                                        |
|--------------|------------------|----------------|-------------|-------------|-------------|----------|----------|---|--------------------------------------------------------------------------------------------------------|
| ZNF680       | ENSOG00000173041 | protein_coding | 159,4250747 | 414,5064736 | 2,600008025 | 1,378516 | 0,018528 | 1 | zinc finger protein 680 [Source:HGNC Symbol;Acc:26897]                                                 |
| ME1          | ENSG00000005833  | protein_coding | 862,4513646 | 862,4513646 | 0,391835785 | -1,35168 | 0,01853  | 1 | malic enzyme 1, NAD(P)+-dependent, cytosolic [Source:HGNC Symbol;Acc:6983]                             |
| AP003068.23  | ENSG00000254614  | protein_coding | 19,69185216 | 3,090821003 | 0,156959385 | -2,67154 | 0,018661 | 1 | Uncharacterized protein [Source:UniProtKB/TrEMBL;Acc:E9PK70]                                           |
| CDH23        | ENSG00000107736  | protein_coding | 73,90144932 | 208,6346948 | 2,82314754  | 1,497305 | 0,01908  | 1 | cadherin-related 23 [Source:HGNC Symbol;Acc:13733]                                                     |
| LMCD1        | ENSG00000017282  | protein_coding | 2481,36975  | 999,9541462 | 0,402984741 | -1,3112  | 0,019274 | 1 | LIM and cysteine-rich domains 1 [Source:HGNC Symbol;Acc:6633]                                          |
| SERPINB8     | ENSG00000166401  | protein_coding | 203,904766  | 69,68365045 | 0,34174606  | -1,549   | 0,019458 | 1 | serpin peptidase inhibitor, clade B (ovalbumin), member 8 [Source:HGNC Symbol;Acc:8952]                |
| KLHL40       | ENSG00000157119  | protein_coding | 0           | 23,6475939  | #N/A        | #N/A     | 0,019486 | 1 | kelch-like family member 40 [Source:HGNC Symbol;Acc:30372]                                             |
| TXNRD2       | ENSG00000184470  | protein_coding | 46,73511822 | 144,0231104 | 3,081689229 | 1,623721 | 0,019533 | 1 | thioredoxin reductase 2 [Source:HGNC Symbol;Acc:18155]                                                 |
| GTF2H2       | ENSG00000145736  | protein_coding | 118,5122569 | 334,78399   | 2,824889162 | 1,498194 | 0,019562 | 1 | general transcription factor IIH, polypeptide 2, 44kDa [Source:HGNC Symbol;Acc:4656]                   |
| SLFN13       | ENSG00000154760  | protein_coding | 89,97812065 | 255,6154711 | 2,840862526 | 1,506329 | 0,019631 | 1 | schlafen family member 13 [Source:HGNC Symbol;Acc:26481]                                               |
| PCSK1N       | ENSG00000102109  | protein_coding | 187,711068  | 38,30818084 | 0,204080565 | -2,29279 | 0,019637 | 1 | proprotein convertase subtilisin/kexin type 1 inhibitor [Source:HGNC Symbol;Acc:17301]                 |
| THSD7B       | ENSG00000144229  | protein_coding | 65,4343988  | 180,5998001 | 2,760013134 | 1,464675 | 0,019675 | 1 | thrombospondin, type I, domain containing 7B [Source:HGNC Symbol;Acc:29348]                            |
| RG511        | ENSG00000076344  | protein_coding | 37,00923797 | 116,1547183 | 3,138533099 | 1,65009  | 0,019693 | 1 | regulator of G-protein signaling 11 [Source:HGNC Symbol;Acc:9993]                                      |
| GDF3         | ENSG00000184344  | protein_coding | 9,846932485 | 0,497861413 | 0,050560051 | -4,30586 | 0,020209 | 1 | growth differentiation factor 3 [Source:HGNC Symbol;Acc:4218]                                          |
| ISL1         | ENSG00000016082  | protein_coding | 90,83756315 | 261,6612124 | 2,88053976  | 1,526339 | 0,020482 | 1 | ISL LIM homeobox 1 [Source:HGNC Symbol;Acc:6132]                                                       |
| UCN          | ENSG00000163794  | protein_coding | 7,976803146 | 33,29896488 | 4,174474945 | 2,061595 | 0,020705 | 1 | urocortin [Source:HGNC Symbol;Acc:12516]                                                               |
| CERKL        | ENSG00000188452  | protein_coding | 105,9357526 | 314,6758826 | 2,970440813 | 1,570677 | 0,020801 | 1 | ceramide kinase-like [Source:HGNC Symbol;Acc:21699]                                                    |
| N4BP2L1      | ENSG00000139597  | protein_coding | 88,72734214 | 245,1485345 | 2,762942387 | 1,466205 | 0,021381 | 1 | NEDD4 binding protein 2-like 1 [Source:HGNC Symbol;Acc:25037]                                          |
| ABHD12B      | ENSG00000131969  | protein_coding | 6,356829508 | 28,118146   | 4,423297175 | 2,145122 | 0,021435 | 1 | abhydrolase domain containing 12B [Source:HGNC Symbol;Acc:19837]                                       |
| ITGA4        | ENSG00000152322  | protein_coding | 224,6881011 | 711,1438461 | 3,165026731 | 1,662218 | 0,021486 | 1 | integrin, alpha 4 (antigen CD49D, alpha 4 subunit of VLA-4 receptor) [Source:HGNC Symbol;Acc:6140]     |
| MAP7D3       | ENSG00000129680  | protein_coding | 598,1676468 | 225,7437864 | 0,37739217  | -1,40586 | 0,021542 | 1 | MAP7 domain containing 3 [Source:HGNC Symbol;Acc:25742]                                                |
| NPPA         | ENSG00000175206  | protein_coding | 40,25924928 | 8,365091793 | 0,20778062  | -2,26687 | 0,021751 | 1 | natriuretic peptide A [Source:HGNC Symbol;Acc:7939]                                                    |
| AIFM3        | ENSG00000183773  | protein_coding | 13,83332125 | 48,66981859 | 3,518303212 | 1,81488  | 0,021761 | 1 | apoptosis-inducing factor, mitochondrion-associated, 3 [Source:HGNC Symbol;Acc:26398]                  |
| SYCP2L       | ENSG00000153157  | protein_coding | 94,57782183 | 269,6065938 | 2,8506323   | 1,511282 | 0,021812 | 1 | synaptonemal complex protein 2-like [Source:HGNC Symbol;Acc:21537]                                     |
| KCNK1        | ENSG00000129159  | protein_coding | 85,86061561 | 238,6457343 | 2,779455197 | 1,474802 | 0,021827 | 1 | potassium voltage-gated channel, Shaw-related subfamily, member 1 [Source:HGNC Symbol;Acc:6233]        |
| PKSK9        | ENSG00000169174  | protein_coding | 188,3870613 | 543,3115784 | 2,884017483 | 1,52808  | 0,022034 | 1 | proprotein convertase subtilisin/kexin type 9 [Source:HGNC Symbol;Acc:20001]                           |
| JACMIP1      | ENSG00000152969  | protein_coding | 4,734843063 | 24,63311611 | 5,20252008  | 2,379211 | 0,022153 | 1 | janus kinase and microtubule interacting protein 1 [Source:HGNC Symbol;Acc:26460]                      |
| ERBB3        | ENSG00000065361  | protein_coding | 1064,614821 | 2652,641918 | 2,491644739 | 1,317098 | 0,022413 | 1 | v-erb-b2 avian erythroblastic leukemia viral oncogene homolog 3 [Source:HGNC Symbol;Acc:3431]          |
| IL1RAP       | ENSG00000196083  | protein_coding | 279,5210747 | 105,9544829 | 0,379057225 | -1,39951 | 0,022428 | 1 | interleukin 1 receptor accessory protein [Source:HGNC Symbol;Acc:5995]                                 |
| ERVV-1       | ENSG00000269526  | protein_coding | 13,95638629 | 1,695788987 | 0,121506309 | -3,0409  | 0,022967 | 1 | endogenous retrovirus group V, member 1 [Source:HGNC Symbol;Acc:26501]                                 |
| NTN5         | ENSG00000142233  | protein_coding | 19,06847572 | 103,9409896 | 5,450933318 | 2,446503 | 0,023028 | 1 | netrin 5 [Source:HGNC Symbol;Acc:25208]                                                                |
| ALPL         | ENSG00000162551  | protein_coding | 391,0692281 | 1025,557806 | 2,622445675 | 1,390913 | 0,023643 | 1 | alkaline phosphatase, liver/bone/kidney [Source:HGNC Symbol;Acc:438]                                   |
| EDN1         | ENSG00000078401  | protein_coding | 360,4976157 | 118,5675208 | 0,328899598 | -1,60428 | 0,023772 | 1 | endothelin 1 [Source:HGNC Symbol;Acc:3176]                                                             |
| ZNF717       | ENSG00000227124  | protein_coding | 95,5985727  | 23,30093417 | 0,24373726  | -2,0366  | 0,02428  | 1 | zinc finger protein 717 [Source:HGNC Symbol;Acc:29448]                                                 |
| DCST2        | ENSG00000163354  | protein_coding | 15,45329489 | 60,14613261 | 3,892123528 | 1,960557 | 0,024768 | 1 | DC-STAMP domain containing 2 [Source:HGNC Symbol;Acc:26562]                                            |
| RNASE1       | ENSG00000129538  | protein_coding | 32,76866789 | 165,6792587 | 5,056026667 | 2,338004 | 0,024897 | 1 | ribonuclease, RNase A family, 1 (pancreatic) [Source:HGNC Symbol;Acc:10044]                            |
| RNF157       | ENSG00000141576  | protein_coding | 375,2467381 | 952,0630282 | 2,537165368 | 1,343218 | 0,024982 | 1 | ring finger protein 157 [Source:HGNC Symbol;Acc:29402]                                                 |
| ATP8B3       | ENSG00000130270  | protein_coding | 56,19675312 | 170,3469152 | 3,031259028 | 1,599917 | 0,025097 | 1 | ATPase, aminophospholipid transporter, class I, type 8B, member 3 [Source:HGNC Symbol;Acc:13535]       |
| DTX1         | ENSG00000135144  | protein_coding | 50,96964988 | 159,6845205 | 3,13293344  | 1,647514 | 0,02534  | 1 | deltex homolog 1 (Drosophila) [Source:HGNC Symbol;Acc:3060]                                            |
| NSMCE1       | ENSG00000169189  | protein_coding | 194,5380169 | 504,2286343 | 2,591928521 | 1,374026 | 0,025952 | 1 | non-SMC element 1 homolog (S. cerevisiae) [Source:HGNC Symbol;Acc:29897]                               |
| C10r1111     | ENSG00000171722  | protein_coding | 3,988401573 | 21,24663845 | 5,327106125 | 2,413352 | 0,025977 | 1 | chromosome 1 open reading frame 111 [Source:HGNC Symbol;Acc:27648]                                     |
| KB-1507C5.2  | ENSG0000025320   | protein_coding | 25,42127961 | 79,46417548 | 3,125892036 | 1,644268 | 0,026067 | 1 | HCG15011, isoform CRA a; Protein LOC100996457 [Source:UniProtKB/TrEMBL;Acc:G3V139]                     |
| LAPTM5       | ENSG00000162511  | protein_coding | 20,68241093 | 76,74206183 | 3,710498843 | 1,891613 | 0,026363 | 1 | lysosomal protein transmembrane 5 [Source:HGNC Symbol;Acc:29612]                                       |
| SOX8         | ENSG00000005513  | protein_coding | 152,5377417 | 397,854441  | 2,608236077 | 1,383074 | 0,026365 | 1 | SRY (sex determining region Y)-box 8 [Source:HGNC Symbol;Acc:11203]                                    |
| MMPED1       | ENSG00000186732  | protein_coding | 8,350023891 | 33,29896488 | 3,987888575 | 1,995625 | 0,026384 | 1 | metallophosphoesterase domain containing 1 [Source:HGNC Symbol;Acc:1306]                               |
| FAM129A      | ENSG00000135842  | protein_coding | 625,8342893 | 250,6011549 | 0,400427332 | -1,32039 | 0,026612 | 1 | family with sequence similarity 129, member A [Source:HGNC Symbol;Acc:16784]                           |
| IL31RA       | ENSG00000164509  | protein_coding | 29,16153829 | 7,571573717 | 0,259642466 | -1,9454  | 0,02671  | 1 | interleukin 31 receptor A [Source:HGNC Symbol;Acc:18969]                                               |
| CDKN1A       | ENSG00000124762  | protein_coding | 4115,037852 | 1587,222306 | 0,385712687 | -1,3744  | 0,026911 | 1 | cyclin-dependent kinase inhibitor 1A (p21, Cip1) [Source:HGNC Symbol;Acc:1784]                         |
| GBP4         | ENSG00000162654  | protein_coding | 124,3728006 | 48,40641016 | 0,38920415  | -1,3614  | 0,027054 | 1 | guanylate binding protein 4 [Source:HGNC Symbol;Acc:20480]                                             |
| AP001055.1   | ENSG00000267913  | protein_coding | 13,83533406 | 44,98258395 | 3,251282822 | 1,701009 | 0,027056 | 1 |                                                                                                        |
| SLC25A27     | ENSG00000153291  | protein_coding | 256,7344812 | 636,612382  | 2,479652827 | 1,310138 | 0,027246 | 1 | solute carrier family 25, member 27 [Source:HGNC Symbol;Acc:21065]                                     |
| IL1ORA       | ENSG00000110324  | protein_coding | 4,73685587  | 22,4292651  | 4,735053317 | 2,243381 | 0,027322 | 1 | interleukin 10 receptor, alpha [Source:HGNC Symbol;Acc:5964]                                           |
| GLYT1L2      | ENSG00000156689  | protein_coding | 22,05625448 | 69,11273835 | 3,13347574  | 1,647764 | 0,027467 | 1 | glycine-N-acyltransferase-like 2 [Source:HGNC Symbol;Acc:24178]                                        |
| IGF1         | ENSG00000117427  | protein_coding | 40,6264316  | 12,3530834  | 0,304065184 | -1,71755 | 0,027577 | 1 | insulin-like growth factor 1 (somatomedin C) [Source:HGNC Symbol;Acc:5464]                             |
| TIE1         | ENSG00000066056  | protein_coding | 76,87715124 | 220,014103  | 2,861891986 | 1,516969 | 0,027957 | 1 | tyrosine kinase with immunoglobulin-like and EGF-like domains 1 [Source:HGNC Symbol;Acc:11809]         |
| DOC2A        | ENSG00000149927  | protein_coding | 27,04326605 | 80,66720337 | 2,98289427  | 1,576713 | 0,028019 | 1 | double C2-like domains, alpha [Source:HGNC Symbol;Acc:2985]                                            |
| KCNE4        | ENSG00000152049  | protein_coding | 307,3772049 | 50,70371309 | 0,164955996 | -2,59985 | 0,028434 | 1 | potassium voltage-gated channel, Isk-related family, member 4 [Source:HGNC Symbol;Acc:6244]            |
| SLC6A3       | ENSG00000142319  | protein_coding | 5,233141659 | 67,14169392 | 12,83009295 | 3,68146  | 0,02847  | 1 | solute carrier family 6 (neurotransmitter transporter), member 3 [Source:HGNC Symbol;Acc:11049]        |
| API33        | ENSG00000152056  | protein_coding | 153,3971842 | 60,58789065 | 0,394973943 | -1,34017 | 0,028503 | 1 | adaptor-related protein complex 1, sigma 3 subunit [Source:HGNC Symbol;Acc:18971]                      |
| COLCA1       | ENSG00000196167  | protein_coding | 4,609765212 | 23,53374076 | 5,105192928 | 2,351965 | 0,028579 | 1 | colorectal cancer associated 1 [Source:HGNC Symbol;Acc:33789]                                          |
| CHRNB4       | ENSG00000117971  | protein_coding | 41,37891152 | 111,8965716 | 2,704193211 | 1,435198 | 0,02863  | 1 | cholinergic receptor, nicotinic, beta 4 (neuronal) [Source:HGNC Symbol;Acc:1964]                       |
| FLRT2        | ENSG00000185070  | protein_coding | 4883,326574 | 2112,195619 | 0,432532125 | -1,20912 | 0,028656 | 1 | fibronectin leucine rich transmembrane protein 2 [Source:HGNC Symbol;Acc:3761]                         |
| CGREF1       | ENSG00000138028  | protein_coding | 14,95298349 | 50,36560758 | 3,368264776 | 1,752006 | 0,029007 | 1 | cell growth regulator with EF-hand domain 1 [Source:HGNC Symbol;Acc:16962]                             |
| FBN3         | ENSG00000142449  | protein_coding | 743,8666467 | 1997,380313 | 2,685132237 | 1,424993 | 0,029295 | 1 | fibrillin 3 [Source:HGNC Symbol;Acc:18794]                                                             |
| C1orf173     | ENSG00000178965  | protein_coding | 4,859920914 | 23,62719267 | 4,861641392 | 2,281443 | 0,029702 | 1 | chromosome 1 open reading frame 173 [Source:HGNC Symbol;Acc:25346]                                     |
| SYNGR3       | ENSG00000127561  | protein_coding | 25,17716233 | 121,2981887 | 4,817786337 | 2,26837  | 0,030259 | 1 | synaptogyrin 3 [Source:HGNC Symbol;Acc:11501]                                                          |
| OGN          | ENSG00000106809  | protein_coding | 33,77532911 | 9,267362704 | 0,274382603 | -1,86574 | 0,030626 | 1 | osteoglycin [Source:HGNC Symbol;Acc:8126]                                                              |
| HHAT1L       | ENSG00000102822  | protein_coding | 0,623376446 | 9,474667759 | 15,19895051 | 3,9259   | 0,030629 | 1 | hedgehog acyltransferase-like [Source:HGNC Symbol;Acc:13242]                                           |
| AC016757.3   | ENSG00000186235  | protein_coding | 9,221543231 | 34,60564528 | 3,752695662 | 1,907927 | 0,030669 | 1 | Protein LOC151174 [Source:UniProtKB/TrEMBL;Acc:E7EUL1]                                                 |
| CTD-308BG3.8 | ENSG00000188897  | protein_coding | 46,85818326 | 183,0364577 | 3,906179135 | 1,965758 | 0,030964 | 1 | Protein LOC388210 [Source:UniProtKB/TrEMBL;Acc:3L099]                                                  |
| ISLR2        | ENSG00000167178  | protein_coding | 16,95221629 | 75,21112905 | 4,43665464  | 2,149472 | 0,031208 | 1 | immunoglobulin superfamily containing leucine-rich repeat 2 [Source:HGNC Symbol;Acc:29286]             |
| NXPH3        | ENSG00000182575  | protein_coding | 22,05424168 | 71,07358216 | 3,222671774 | 1,688257 | 0,031451 | 1 | neuraxophilin 3 [Source:HGNC Symbol;Acc:8077]                                                          |
| CES1         | ENSG00000198848  | protein_coding | 9,221543231 | 34,99475386 | 3,794891265 | 1,924059 | 0,031623 | 1 | carboxylesterase 1 [Source:HGNC Symbol;Acc:1863]                                                       |
| KCNAB3       | ENSG00000170049  | protein_coding | 113,7874779 | 281,8441776 | 2,476934922 | 1,308556 | 0,031732 | 1 | potassium voltage-gated channel, shaker-related subfamily, beta member 3 [Source:HGNC Symbol;Acc:6230] |
| FODX3        | ENSG00000187140  | protein_coding | 45,98263831 | 203,9874395 | 4,436183895 | 2,149319 | 0,031795 | 1 | forkhead box D3 [Source:HGNC Symbol;Acc:3804]                                                          |
| LOXL3        | ENSG00000115318  | protein_coding | 356,0974662 | 938,4271195 | 2,635309735 | 1,397973 | 0,031877 | 1 | lysyl oxidase-like 3 [Source:HGNC Symbol;Acc:13869]                                                    |
| FLRT1        | ENSG00000126500  | protein_coding | 39,74887384 | 112,9908466 | 2,842617557 | 1,50722  | 0,032093 | 1 | fibronectin leucine rich transmembrane protein 1 [Source:HGNC Symbol;Acc:3760]                         |
| ADSSL1       | ENSG00000185100  | protein_coding | 108,0439608 | 276,3371002 | 2,557635784 | 1,354811 | 0,032337 | 1 | adenylosuccinate synthase like 1 [Source:HGNC Symbol;Acc:20093]                                        |
| GBP2         | ENSG00000162645  | protein_coding | 168,8766456 | 67,14334032 | 0,397588074 | -1,33065 | 0,032367 | 1 | guanylate binding protein 2, interferon-inducible [Source:HGNC Symbol;Acc:4183]                        |
| RARRES2      | ENSG00000106538  | protein_coding | 184,8242134 | 450,2777982 | 2,436248962 | 1,284662 | 0,032475 | 1 | retinoic acid receptor responder (tazarotene induced) 2 [Source:HGNC Symbol;Acc:9868]                  |



|          |                  |                |             |             |             |          |          |   |                                                                                                                                     |
|----------|------------------|----------------|-------------|-------------|-------------|----------|----------|---|-------------------------------------------------------------------------------------------------------------------------------------|
| GRTP1    | ENSG00000139835  | protein_coding | 104,3278558 | 256,8117523 | 2,46158373  | 1,299587 | 0,032963 | 1 | growth hormone regulated TBC protein 1 [Source:HGNC Symbol;Acc:20310]                                                               |
| YPE1L    | ENSG00000100027  | protein_coding | 303,5987029 | 725,2402677 | 2,388812142 | 1,256293 | 0,033125 | 1 | yippee-like 1 (Drosophila) [Source:HGNC Symbol;Acc:12845]                                                                           |
| SPINK5   | ENSG00000133710  | protein_coding | 117,7960075 | 8,572396849 | 0,072773238 | -3,78045 | 0,033189 | 1 | serine peptidase inhibitor, Kazal type 5 [Source:HGNC Symbol;Acc:15464]                                                             |
| CCDC163P | ENSG00000236624  | protein_coding | 181,3320977 | 68,50102379 | 0,377765573 | -1,40444 | 0,033444 | 1 | coiled-coil domain containing 163, pseudogene [Source:HGNC Symbol;Acc:27003]                                                        |
| MAATS1   | ENSG00000183833  | protein_coding | 59,68685609 | 484,440039  | 8,116360465 | 3,020833 | 0,033476 | 1 | MYCBP-associated, testis expressed 1 [Source:HGNC Symbol;Acc:24010]                                                                 |
| NEUROG2  | ENSG00000178403  | protein_coding | 60,31627096 | 160,2293911 | 2,656495976 | 1,409525 | 0,033535 | 1 | neurogenin 2 [Source:HGNC Symbol;Acc:13805]                                                                                         |
| ZNFA93   | ENSG00000196268  | protein_coding | 143,7923562 | 374,4396537 | 2,604030309 | 1,380746 | 0,033714 | 1 | zinc finger protein 493 [Source:HGNC Symbol;Acc:23708]                                                                              |
| TEX15    | ENSG00000133863  | protein_coding | 82,86478562 | 224,6817596 | 2,711426306 | 1,439052 | 0,033726 | 1 | testis expressed 15 [Source:HGNC Symbol;Acc:11738]                                                                                  |
| PLCG2    | ENSG00000197943  | protein_coding | 60,56642666 | 160,6190396 | 2,651948423 | 1,407053 | 0,033818 | 1 | phospholipase C, gamma 2 (phosphatidylinositol-specific) [Source:HGNC Symbol;Acc:9066]                                              |
| MYOM2    | ENSG00000036448  | protein_coding | 122,7608782 | 48,41151047 | 0,394356176 | -1,34243 | 0,034178 | 1 | myomesin 2 [Source:HGNC Symbol;Acc:7614]                                                                                            |
| CHST6    | ENSG00000183196  | protein_coding | 32,64761565 | 94,61752353 | 2,898144984 | 1,53513  | 0,03427  | 1 | carbohydrate (N-acetylglucosamine 6-O) sulfotransferase 6 [Source:HGNC Symbol;Acc:6938]                                             |
| ZNZF29   | ENSG00000167383  | protein_coding | 0           | 61,05515023 | #N/A        | #N/A     | 0,034519 | 1 | zinc finger protein 229 [Source:HGNC Symbol;Acc:13022]                                                                              |
| TUSC1    | ENSG00000198680  | protein_coding | 167,5148789 | 38,33368237 | 0,228837478 | -2,1276  | 0,034734 | 1 | tumor suppressor candidate 1 [Source:HGNC Symbol;Acc:31010]                                                                         |
| CLEC18C  | ENSG00000157335  | protein_coding | 9,348633889 | 32,30834236 | 3,455942627 | 1,789079 | 0,035128 | 1 | C-type lectin domain family 18, member C [Source:HGNC Symbol;Acc:28538]                                                             |
| EFHB     | ENSG00000163576  | protein_coding | 13,7082434  | 54,46235202 | 3,972963598 | 1,990216 | 0,035363 | 1 | EF-hand domain family, member B [Source:HGNC Symbol;Acc:26330]                                                                      |
| NR2E1    | ENSG00000112333  | protein_coding | 19,57281273 | 112,0257257 | 5,723537398 | 2,516907 | 0,035497 | 1 | nuclear receptor subfamily 2, group E, member 1 [Source:HGNC Symbol;Acc:7973]                                                       |
| ITGAL    | ENSG0000005844   | protein_coding | 1,619973638 | 13,45245867 | 8,304122017 | 3,053828 | 0,035659 | 1 | integrin, alpha L (antigen CD11a (p180), lymphocyte function-associated antigen 1; alpha polypeptide) [Source:HGNC Symbol;Acc:6148] |
| COL9A2   | ENSG00000049089  | protein_coding | 265,2377622 | 612,7999319 | 2,310379664 | 1,20813  | 0,0357   | 1 | collagen, type IX, alpha 2 [Source:HGNC Symbol;Acc:2218]                                                                            |
| ZNFC34C  | ENSG00000177932  | protein_coding | 82,39064071 | 233,18966   | 2,830293076 | 1,500951 | 0,035923 | 1 | zinc finger protein 354C [Source:HGNC Symbol;Acc:16736]                                                                             |
| CLEC19A  | ENSG00000261210  | protein_coding | 1,745051489 | 13,25535431 | 7,595967453 | 2,925234 | 0,035951 | 1 | C-type lectin domain family 19, member A [Source:HGNC Symbol;Acc:34522]                                                             |
| FAM203B  | ENSG00000230567  | protein_coding | 0,623376446 | 9,075358568 | 14,55839184 | 3,863779 | 0,036186 | 1 | family with sequence similarity 203, member B [Source:HGNC Symbol;Acc:32323]                                                        |
| MT1X     | ENSG00000187193  | protein_coding | 47,10632616 | 16,04031804 | 8,340513034 | -1,55422 | 0,03631  | 1 | metallothionein 1X [Source:HGNC Symbol;Acc:7405]                                                                                    |
| FTL      | ENSG00000087086  | protein_coding | 46461,01812 | 19453,26896 | 0,418700875 | -1,25601 | 0,036358 | 1 | ferritin, light polypeptide [Source:HGNC Symbol;Acc:3999]                                                                           |
| ZNF253   | ENSG00000256771  | protein_coding | 134,0523863 | 375,3792731 | 2,800243125 | 1,485552 | 0,036425 | 1 | zinc finger protein 253 [Source:HGNC Symbol;Acc:13497]                                                                              |
| EFNA2    | ENSG00000099617  | protein_coding | 132,573593  | 345,2119317 | 2,6039268   | 1,380689 | 0,036557 | 1 | ephrin-A2 [Source:HGNC Symbol;Acc:3222]                                                                                             |
| LPAR6    | ENSG00000139679  | protein_coding | 217,3326616 | 530,3485879 | 2,440261781 | 1,287036 | 0,03665  | 1 | lysophosphatidic acid receptor 6 [Source:HGNC Symbol;Acc:15520]                                                                     |
| IL7R     | ENSG00000168685  | protein_coding | 22,3104358  | 5,082266654 | 0,227797731 | -2,13417 | 0,036712 | 1 | interleukin 7 receptor [Source:HGNC Symbol;Acc:6024]                                                                                |
| SULT4A1  | ENSG00000130540  | protein_coding | 138,5773298 | 389,0883936 | 2,807734816 | 1,489407 | 0,036742 | 1 | sulfotransferase family 4A, member 1 [Source:HGNC Symbol;Acc:14903]                                                                 |
| LDHC     | ENSG00000166796  | protein_coding | 6,231751657 | 0           | 0           | #N/A     | 0,037193 | 1 | lactate dehydrogenase C [Source:HGNC Symbol;Acc:6544]                                                                               |
| PRRT1    | ENSG00000204314  | protein_coding | 77,02436997 | 187,2011526 | 2,43041459  | 1,281202 | 0,037459 | 1 | proline-rich transmembrane protein 1 [Source:HGNC Symbol;Acc:13943]                                                                 |
| SLC8A2   | ENSG00000118160  | protein_coding | 59,06347965 | 160,9928473 | 2,725759611 | 1,446658 | 0,037612 | 1 | solute carrier family 8 (sodium/calcium exchanger), member 2 [Source:HGNC Symbol;Acc:11069]                                         |
| RNF148   | ENSG00000235631  | protein_coding | 6,481907358 | 0           | 0           | #N/A     | 0,037681 | 1 | ring finger protein 148 [Source:HGNC Symbol;Acc:22411]                                                                              |
| HMX1     | ENSG00000215612  | protein_coding | 2,118272234 | 14,45838219 | 6,825554318 | 2,770946 | 0,038129 | 1 | H6 family homeobox 1 [Source:HGNC Symbol;Acc:5017]                                                                                  |
| MROH7    | ENSG00000184313  | protein_coding | 15,82651563 | 50,04954969 | 3,162385887 | 1,661013 | 0,038183 | 1 | maestro heat-like repeat family member 7 [Source:HGNC Symbol;Acc:24802]                                                             |
| MAGEH1   | ENSG00000187601  | protein_coding | 325,6486351 | 914,0521504 | 2,806866211 | 1,48896  | 0,038239 | 1 | melanoma antigen family H, 1 [Source:HGNC Symbol;Acc:24092]                                                                         |
| BEND4    | ENSG00000188848  | protein_coding | 64,80699674 | 205,5744757 | 3,172103106 | 1,66544  | 0,038683 | 1 | BEN domain containing 4 [Source:HGNC Symbol;Acc:23815]                                                                              |
| ELTD1    | ENSG00000162618  | protein_coding | 180,7288493 | 56,49114621 | 0,312574038 | -1,67773 | 0,039276 | 1 | EGF, latrophilin and seven transmembrane domain containing 1 [Source:HGNC Symbol;Acc:20822]                                         |
| MT1E     | ENSG00000169715  | protein_coding | 230,7686084 | 54,48439964 | 0,236099702 | -2,08253 | 0,039446 | 1 | metallothionein 1E [Source:HGNC Symbol;Acc:7397]                                                                                    |
| CD40     | ENSG00000101017  | protein_coding | 9,848945292 | 83,90247935 | 8,518930389 | 3,090672 | 0,039472 | 1 | CD40 molecule, TNF receptor superfamily member 5 [Source:HGNC Symbol;Acc:11919]                                                     |
| CACNG6   | ENSG00000130433  | protein_coding | 10,09507538 | 38,70238973 | 3,833789078 | 1,938771 | 0,039526 | 1 | calcium channel, voltage-dependent, gamma subunit 6 [Source:HGNC Symbol;Acc:13625]                                                  |
| TMEM31   | ENSG00000179363  | protein_coding | 2,866726531 | 15,95196643 | 5,564523249 | 2,476258 | 0,039717 | 1 | transmembrane protein 31 [Source:HGNC Symbol;Acc:28601]                                                                             |
| CD74     | ENSG00000019582  | protein_coding | 165,989791  | 418,8240165 | 2,52319142  | 1,33525  | 0,039722 | 1 | CD74 molecule, major histocompatibility complex, class II invariant chain [Source:HGNC Symbol;Acc:1697]                             |
| PSORS1C1 | ENSG00000204540  | protein_coding | 14,08347695 | 2,390754842 | 0,169756009 | -2,55847 | 0,03975  | 1 | psoriasis susceptibility 1 candidate 1 [Source:HGNC Symbol;Acc:17202]                                                               |
| DOCK6    | ENSG000000130158 | protein_coding | 530,8812339 | 1256,820678 | 2,367423441 | 1,243318 | 0,040322 | 1 | dedicator of cytokinesis 6 [Source:HGNC Symbol;Acc:19189]                                                                           |
| GRIN3B   | ENSG00000116032  | protein_coding | 7,228348849 | 27,81228872 | 3,8476683   | 1,943984 | 0,040972 | 1 | glutamate receptor, ionotropic, N-methyl-D-aspartate 3B [Source:HGNC Symbol;Acc:16768]                                              |
| TAF13    | ENSG00000197780  | protein_coding | 907,5239564 | 387,2718436 | 0,426734568 | -1,22859 | 0,04102  | 1 | TAF13 RNA polymerase II, TATA box binding protein (TBP)-associated factor, 18kDa [Source:HGNC Symbol;Acc:11546]                     |
| GRID1    | ENSG00000182771  | protein_coding | 179,3429289 | 69,79750359 | 0,389184586 | -1,36147 | 0,041057 | 1 | glutamate receptor, ionotropic, delta 1 [Source:HGNC Symbol;Acc:4575]                                                               |
| BEST4    | ENSG00000142959  | protein_coding | 6,231751657 | 24,33235914 | 3,904577795 | 1,965167 | 0,041234 | 1 | bestrophin 4 [Source:HGNC Symbol;Acc:17106]                                                                                         |
| HSO11B2  | ENSG00000176387  | protein_coding | 26,04465606 | 88,67378842 | 3,404682643 | 1,76752  | 0,041661 | 1 | hydroxysteroid (11-beta) dehydrogenase 2 [Source:HGNC Symbol;Acc:5209]                                                              |
| KCNJ15   | ENSG00000157551  | protein_coding | 23,0588901  | 5,481575845 | 0,237720715 | -2,07266 | 0,041666 | 1 | potassium inwardly-rectifying channel, subfamily J, member 15 [Source:HGNC Symbol;Acc:6261]                                         |
| CECR1    | ENSG00000093072  | protein_coding | 205,2967248 | 621,6918405 | 3,028259906 | 1,598489 | 0,041689 | 1 | cat eye syndrome chromosome region, candidate 1 [Source:HGNC Symbol;Acc:1839]                                                       |
| Cboraf47 | ENSG000000177459 | protein_coding | 56,5820507  | 20,61962297 | 0,36441986  | -1,45633 | 0,041808 | 1 | chromosome 8 open reading frame 47 [Source:HGNC Symbol;Acc:26823]                                                                   |
| WIF1     | ENSG00000156076  | protein_coding | 7,849712488 | 30,8980942  | 3,936196322 | 1,976802 | 0,0419   | 1 | WNT inhibitory factor 1 [Source:HGNC Symbol;Acc:18081]                                                                              |
| PRKG2    | ENSG00000138669  | protein_coding | 15,08208695 | 43,98176082 | 2,916158816 | 1,544069 | 0,041999 | 1 | protein kinase, cGMP-dependent, type II [Source:HGNC Symbol;Acc:9416]                                                               |
| TMEM74B  | ENSG00000125895  | protein_coding | 59,56580386 | 152,8656624 | 2,566332569 | 1,359708 | 0,042083 | 1 | transmembrane protein 74B [Source:HGNC Symbol;Acc:15893]                                                                            |
| UNC5CL   | ENSG00000124602  | protein_coding | 46,48898813 | 116,4707762 | 2,505341177 | 1,325007 | 0,042165 | 1 | unc-5 homolog C (C. elegans)-like [Source:HGNC Symbol;Acc:21203]                                                                    |
| TYRP1    | ENSG00000107165  | protein_coding | 141,8213027 | 60,26163215 | 0,424912415 | -1,23476 | 0,042392 | 1 | tyrosinase-related protein 1 [Source:HGNC Symbol;Acc:12450]                                                                         |
| LRRRC36  | ENSG00000159708  | protein_coding | 6,604972402 | 25,23463005 | 3,820550415 | 1,93378  | 0,043126 | 1 | leucine rich repeat containing 36 [Source:HGNC Symbol;Acc:25615]                                                                    |
| SNCG     | ENSG00000173267  | protein_coding | 81,75921303 | 452,5055043 | 2,468482    | 2,468482 | 0,043346 | 1 | synuclein, gamma (breast cancer-specific protein 1) [Source:HGNC Symbol;Acc:11141]                                                  |
| PCBP3    | ENSG00000183570  | protein_coding | 50,59642913 | 148,6177163 | 2,937316305 | 1,554499 | 0,043502 | 1 | poly(rC) binding protein 3 [Source:HGNC Symbol;Acc:8651]                                                                            |
| PAIP2B   | ENSG00000124374  | protein_coding | 164,002635  | 434,7710437 | 2,651000355 | 1,406537 | 0,044108 | 1 | poly(A) binding protein interacting protein 2B [Source:HGNC Symbol;Acc:29200]                                                       |
| CPA4     | ENSG00000128510  | protein_coding | 219,2269446 | 87,93802011 | 0,401127791 | -1,31787 | 0,044172 | 1 | carboxypeptidase A4 [Source:HGNC Symbol;Acc:15740]                                                                                  |
| PROB1    | ENSG00000228672  | protein_coding | 27,04125325 | 94,55977376 | 3,496870981 | 1,806065 | 0,044433 | 1 | proline-rich basic protein 1 [Source:HGNC Symbol;Acc:41906]                                                                         |
| KCNQ2    | ENSG00000075043  | protein_coding | 226,3422925 | 624,1862479 | 2,757709313 | 1,46347  | 0,044531 | 1 | potassium voltage-gated channel, KQT-like subfamily, member 2 [Source:HGNC Symbol;Acc:6296]                                         |
| IGFLR1   | ENSG00000126246  | protein_coding | 9,346621082 | 0,798618383 | 0,085444609 | -3,54887 | 0,044573 | 1 | IGF-like family receptor 1 [Source:HGNC Symbol;Acc:23620]                                                                           |
| TAGLN2   | ENSG00000158710  | protein_coding | 2813,856843 | 1222,136559 | 0,434327909 | -1,20314 | 0,044954 | 1 | transgelin 2 [Source:HGNC Symbol;Acc:11554]                                                                                         |
| TTL6     | ENSG00000170703  | protein_coding | 17,94277506 | 55,23036856 | 3,078139718 | 1,622059 | 0,045391 | 1 | tubulin tyrosine ligase-like family, member 6 [Source:HGNC Symbol;Acc:26664]                                                        |
| NKD2     | ENSG00000145506  | protein_coding | 123,8865788 | 284,429366  | 2,295865616 | 1,199038 | 0,045565 | 1 | naked cuticle homolog 2 (Drosophila) [Source:HGNC Symbol;Acc:17046]                                                                 |
| KCNQ4    | ENSG00000117013  | protein_coding | 32,89978416 | 111,1183544 | 3,37747974  | 1,755947 | 0,045692 | 1 | potassium voltage-gated channel, KQT-like subfamily, member 4 [Source:HGNC Symbol;Acc:6298]                                         |
| GCKR     | ENSG00000084734  | protein_coding | 4,486700169 | 19,74285359 | 4,400305983 | 2,137604 | 0,045692 | 1 | glucokinase (hexokinase 4) regulator [Source:HGNC Symbol;Acc:4196]                                                                  |
| MT2A     | ENSG00000125148  | protein_coding | 327,5512532 | 125,2572248 | 0,382404963 | -1,38683 | 0,045707 | 1 | metallothionein 2A [Source:HGNC Symbol;Acc:7406]                                                                                    |
| MYH6     | ENSG00000197616  | protein_coding | 382,2916377 | 97,1968286  | 0,254247854 | -1,97569 | 0,045737 | 1 | myosin, heavy chain 6, cardiac muscle, alpha [Source:HGNC Symbol;Acc:7576]                                                          |
| CRYAB    | ENSG00000109846  | protein_coding | 141,0849252 | 57,98983076 | 0,411027831 | -1,28269 | 0,045777 | 1 | crystallin, alpha B [Source:HGNC Symbol;Acc:2389]                                                                                   |
| CERS3    | ENSG00000154227  | protein_coding | 20,94061786 | 3,687234637 | 0,176080508 | -2,50569 | 0,046034 | 1 | ceramide synthase 3 [Source:HGNC Symbol;Acc:23752]                                                                                  |
| MYL7     | ENSG00000106631  | protein_coding | 598,7407031 | 172,7001604 | 0,288438985 | -1,79366 | 0,046088 | 1 | myosin, light chain 7, regulatory [Source:HGNC Symbol;Acc:21719]                                                                    |
| SLITRK4  | ENSG00000179542  | protein_coding | 351,9075002 | 112,5166792 | 0,319733678 | -1,64506 | 0,046534 | 1 | SLIT and NTRK-like family, member 4 [Source:HGNC Symbol;Acc:23502]                                                                  |
| DMXB1    | ENSG00000197587  | protein_coding | 16,44787927 | 124,8036198 | 7,587824406 | 2,923686 | 0,046651 | 1 | diencephalon/mesencephalon homeobox 1 [Source:HGNC Symbol;Acc:19026]                                                                |
| FAM184A  | ENSG00000111879  | protein_coding | 233,8067074 | 529,5346686 | 2,26483951  | 1,179409 | 0,046899 | 1 | family with sequence similarity 184, member A [Source:HGNC Symbol;Acc:20991]                                                        |
| PRSS50   | ENSG00000206549  | protein_coding | 8,226958847 | 49,28153315 | 5,990249138 | 2,582616 | 0,047898 | 1 | protease, serine, 50 [Source:HGNC Symbol;Acc:17910]                                                                                 |
| NRK      | ENSG00000123572  | protein_coding | 358,8756293 | 119,931951  | 0,334188062 | -1,58127 | 0,047948 | 1 | Nik related kinase [Source:HGNC Symbol;Acc:25391]                                                                                   |

|                |                 |                |             |             |             |          |          |          |                                                                                                         |
|----------------|-----------------|----------------|-------------|-------------|-------------|----------|----------|----------|---------------------------------------------------------------------------------------------------------|
| CNPY1          | ENSG00000146910 | protein_coding | 5,48329736  | 23,34173662 | 4,256879591 | 2,089796 | 0,048035 | 1        | canopy FGF signaling regulator 1 [Source:HGNC Symbol;Acc:27786]                                         |
| CDH15          | ENSG00000129910 | protein_coding | 20,43225523 | 61,42731149 | 3,006389201 | 1,588032 | 0,048075 | 1        | cadherin 15, type 1, M-cadherin (myotubule) [Source:HGNC Symbol;Acc:1754]                               |
| GLRB           | ENSG00000109738 | protein_coding | 93,85352121 | 212,8299915 | 2,267682541 | 1,181219 | 0,048443 | 1        | glycine receptor, beta [Source:HGNC Symbol;Acc:4329]                                                    |
| TERT           | ENSG00000164362 | protein_coding | 34,14049863 | 101,4584292 | 2,971791078 | 1,571333 | 0,048474 | 1        | telomerase reverse transcriptase [Source:HGNC Symbol;Acc:11730]                                         |
| CCDC74B        | ENSG00000152076 | protein_coding | 109,7990763 | 253,8976345 | 2,312384067 | 1,209381 | 0,048526 | 1        | coiled-coil domain containing 74B [Source:HGNC Symbol;Acc:25267]                                        |
| ENGASE         | ENSG00000167280 | protein_coding | 537,1371393 | 1202,625188 | 2,238953705 | 1,162825 | 0,048535 | 1        | endo-beta-N-acetylglucosaminidase [Source:HGNC Symbol;Acc:24622]                                        |
| ATP8A1         | ENSG00000124406 | protein_coding | 391,6865661 | 983,9381667 | 2,512054923 | 1,328868 | 0,048634 | 1        | ATPase, aminophospholipid transporter (APLT), class I, type 8A, member 1 [Source:HGNC Symbol;Acc:13531] |
| ROBO1          | ENSG00000169855 | protein_coding | 2163,604478 | 4790,523607 | 2,214414018 | 1,146747 | 0,048824 | 1        | roundabout, axon guidance receptor, homolog 1 (Drosophila) [Source:HGNC Symbol;Acc:10249]               |
| SYNPO          | ENSG00000171992 | protein_coding | 1820,720982 | 858,8502539 | 0,471708879 | -1,08403 | 0,048855 | 1        | synaptopodin [Source:HGNC Symbol;Acc:30672]                                                             |
| UBE2T          | ENSG00000077152 | protein_coding | 259,0968707 | 594,2565623 | 1,293569392 | 1,197595 | 0,04907  | 1        | ubiquitin-conjugating enzyme E2T (putative) [Source:HGNC Symbol;Acc:25009]                              |
| TEKT3          | ENSG00000125409 | protein_coding | 13,33703546 | 38,5987372  | 2,894101715 | 1,533116 | 0,049187 | 1        | tektin 3 [Source:HGNC Symbol;Acc:14293]                                                                 |
| CHRD1L         | ENSG00000101938 | protein_coding | 87,72873215 | 210,0450278 | 2,394255823 | 1,259577 | 0,049274 | 1        | chordin-like 1 [Source:HGNC Symbol;Acc:29861]                                                           |
| HIF3A          | ENSG00000124440 | protein_coding | 346,0690973 | 803,6865116 | 2,322329609 | 1,215573 | 0,049347 | 1        | hypoxia inducible factor 3, alpha subunit [Source:HGNC Symbol;Acc:15825]                                |
| MT1F           | ENSG00000198417 | protein_coding | 79,87901966 | 31,89373225 | 0,399275459 | -1,32454 | 0,049414 | 1        | metallothionein 1F [Source:HGNC Symbol;Acc:7398]                                                        |
| PON1           | ENSG00000005421 | protein_coding | 16,07868414 | 3,386477667 | 0,21061908  | -2,24729 | 0,049638 | 1        | paraoxonase 1 [Source:HGNC Symbol;Acc:9204]                                                             |
| ANGPTL1        | ENSG00000116194 | protein_coding | 32,40349837 | 9,671772202 | 0,29847926  | -1,7443  | 0,049974 | 1        | angiopoietin-like 1 [Source:HGNC Symbol;Acc:489]                                                        |
| ANKRD20A11P    | ENSG00000215559 | pseudogene     | 106,7951951 | 0           | 0           | #N/A     | 6,88E-13 | 9,09E-09 | ankyrin repeat domain 20 family, member A11, pseudogene [Source:HGNC Symbol;Acc:42024]                  |
| PSHP1          | ENSG00000226278 | pseudogene     | 2,118272234 | 157,8085744 | 74,49872206 | 6,219144 | 3,93E-11 | 3,11E-07 | phosphoserine phosphatase pseudogene 1 [Source:HGNC Symbol;Acc:9578]                                    |
| RPSAF53        | ENSG00000214263 | pseudogene     | 75,1461894  | 4,78660999  | 0,063697308 | -3,97262 | 4,09E-06 | 0,013505 | ribosomal protein S4 pseudogene 53 [Source:HGNC Symbol;Acc:36641]                                       |
| CYP4F29P       | ENSG00000228314 | pseudogene     | 437,1105216 | 0,004330469 | -7,85126    | 6,12E-06 | 0,018659 |          | cytochrome P450, family 4, subfamily F, polypeptide 29, pseudogene [Source:HGNC Symbol;Acc:2647]        |
| DDX11L2        | ENSG00000236397 | pseudogene     | 134,6070435 | 18,04706461 | 0,134072216 | -2,89892 | 8,38E-05 | 0,132775 | DEAD/H (Asp-Glu-Ala-Asp/His) box helicase 11 like 2 [Source:HGNC Symbol;Acc:37103]                      |
| RP11-262H14.7  | ENSG00000227582 | pseudogene     | 0           | 21,0933339  | #N/A        | #N/A     | 0,000105 | 0,15349  |                                                                                                         |
| RP11-578O24.2  | ENSG00000254352 | pseudogene     | 0,623376446 | 25,4266341  | 40,78857059 | 5,350093 | 0,000131 | 0,185498 |                                                                                                         |
| RP11-259G18.3  | ENSG00000262539 | pseudogene     | 3,114869425 | 43,16784152 | 13,85863599 | 3,792713 | 0,000175 | 0,231458 |                                                                                                         |
| DND1P1         | ENSG00000264070 | pseudogene     | 8,848322486 | 71,38453974 | 8,067578894 | 3,012136 | 0,00023  | 0,293984 | dead end homolog 1 pseudogene 1 [Source:HGNC Symbol;Acc:31444]                                          |
| HERC2P3        | ENSG00000180229 | pseudogene     | 47,96174304 | 286,409828  | 5,971630927 | 2,578125 | 0,000275 | 0,330325 | hct domain and RLD 2 pseudogene 3 [Source:HGNC Symbol;Acc:4871]                                         |
| AC018865.9     | ENSG00000231240 | pseudogene     | 14,45065928 | 100,090994  | 6,926957273 | 2,792222 | 0,000434 | 0,43118  |                                                                                                         |
| CTD-2514C3.1   | ENSG00000204556 | pseudogene     | 0           | 16,75058481 | #N/A        | #N/A     | 0,000508 | 0,47714  |                                                                                                         |
| AC018865.8     | ENSG00000180178 | pseudogene     | 297,8796233 | 1397,562609 | 4,691702622 | 2,230112 | 0,000694 | 0,61087  |                                                                                                         |
| RP11-217H19.1  | ENSG00000215104 | pseudogene     | 0           | 12,16617957 | #N/A        | #N/A     | 0,003099 | 1        |                                                                                                         |
| OR7E101P       | ENSG00000227019 | pseudogene     | 0,623376446 | 24,93897339 | 40,00628117 | 5,322155 | 0,003509 | 1        | olfactory receptor, family 7, subfamily E, member 101 pseudogene [Source:HGNC Symbol;Acc:15342]         |
| OR2A9P         | ENSG00000228960 | pseudogene     | 10,71845183 | 0           | 0           | #N/A     | 0,003784 | 1        | olfactory receptor, family 2, subfamily A, member 9 pseudogene [Source:HGNC Symbol;Acc:8236]            |
| AC069213.1     | ENSG00000224769 | pseudogene     | 0           | 11,66831816 | #N/A        | #N/A     | 0,003788 | 1        |                                                                                                         |
| USP32P2        | ENSG00000233327 | pseudogene     | 5,858530912 | 33,20551296 | 5,667890715 | 2,502812 | 0,006153 | 1        | ubiquitin specific peptidase 32 pseudogene 2 [Source:HGNC Symbol;Acc:30751]                             |
| RP11-823P9.3   | ENSG00000233974 | pseudogene     | 2,866726531 | 23,23298379 | 8,104359987 | 3,018698 | 0,006187 | 1        |                                                                                                         |
| ZNF385C        | ENSG00000187595 | protein_coding | 41,50197656 | 145,8905023 | 3,515266366 | 1,813634 | 0,006379 | 1        | zinc finger protein 385C [Source:HGNC Symbol;Acc:33722]                                                 |
| ENPP7P10       | ENSG00000249767 | pseudogene     | 0           | 10,5638245  | #N/A        | #N/A     | 0,007091 | 1        | ectonucleotide pyrophosphatase/phosphodiesterase 7 pseudogene 10 [Source:HGNC Symbol;Acc:48693]         |
| NOL58P         | ENSG00000235559 | pseudogene     | 2,368427935 | 20,43781945 | 8,62927647  | 3,10924  | 0,007589 | 1        |                                                                                                         |
| SNX18P13       | ENSG00000230965 | pseudogene     | 8,848322486 | 0           | 0           | #N/A     | 0,008911 | 1        | sorting nexin 18 pseudogene 13 [Source:HGNC Symbol;Acc:39621]                                           |
| RP11-334A14.2  | ENSG00000236360 | pseudogene     | 10,59136117 | 0,399309191 | 0,037701404 | -4,72924 | 0,011197 | 1        |                                                                                                         |
| MED15P9        | ENSG00000237670 | pseudogene     | 7,474478936 | 39,27330183 | 5,254319687 | 2,393504 | 0,012085 | 1        | mediator complex subunit 15 pseudogene 9 [Source:HGNC Symbol;Acc:44130]                                 |
| FER1L4         | ENSG00000088340 | pseudogene     | 118,9136569 | 566,0519622 | 4,760193041 | 2,25102  | 0,012816 | 1        | fer-1-like 4 (C. elegans), pseudogene [Source:HGNC Symbol;Acc:15801]                                    |
| AC023085.1     | ENSG00000235661 | pseudogene     | 1,745051489 | 16,2527234  | 9,313606794 | 3,21934  | 0,01315  | 1        |                                                                                                         |
| AAOCS1P        | ENSG00000250420 | pseudogene     | 0           | 8,774601598 | #N/A        | #N/A     | 0,014364 | 1        | acetoacetyl-CoA synthetase pseudogene 1 [Source:HGNC Symbol;Acc:18226]                                  |
| FNB1P1         | ENSG00000257800 | pseudogene     | 59,81193394 | 9,982729785 | 0,166901973 | -2,58293 | 0,014946 | 1        | formin binding protein 1 pseudogene 1 [Source:HGNC Symbol;Acc:44528]                                    |
| CRHR1-IT1      | ENSG00000204650 | pseudogene     | 365,6721022 | 979,6102621 | 2,678930813 | 1,421657 | 0,015999 | 1        | CRHR1 intronic transcript 1 (non-protein coding) [Source:HGNC Symbol;Acc:26327]                         |
| RP11-208G20.2  | ENSG00000204894 | pseudogene     | 6,730050253 | 32,09593699 | 4,769048638 | 2,253701 | 0,01604  | 1        |                                                                                                         |
| RP11-551L14.1  | ENSG00000177359 | pseudogene     | 8,848322486 | 37,20370518 | 4,204605476 | 2,07197  | 0,016166 | 1        |                                                                                                         |
| SEC1P          | ENSG00000232871 | pseudogene     | 1,745051489 | 14,96134391 | 8,573583077 | 3,099898 | 0,01797  | 1        | secretory blood group 1, pseudogene [Source:HGNC Symbol;Acc:44149]                                      |
| MYO5B2         | ENSG00000238245 | pseudogene     | 1,494895787 | 14,85769138 | 9,938947926 | 3,313093 | 0,020299 | 1        | myosin VB pseudogene 2 [Source:HGNC Symbol;Acc:38496]                                                   |
| SPDYE6         | ENSG00000166667 | pseudogene     | 19,19355357 | 3,386477667 | 0,176438285 | -2,50276 | 0,021231 | 1        | speedy/RINGO cell cycle regulator family member E6 [Source:HGNC Symbol;Acc:35465]                       |
| AL133458.1     | ENSG00000197146 | pseudogene     | 9,346621082 | 36,80439599 | 3,937722057 | 1,977361 | 0,021449 | 1        |                                                                                                         |
| RP11-216M21.1  | ENSG00000237846 | pseudogene     | 18,69324216 | 3,386477667 | 0,18116053  | -2,46466 | 0,021585 | 1        |                                                                                                         |
| RP11-566K19.6  | ENSG00000259344 | pseudogene     | 0,996597191 | 12,66404098 | 12,70728143 | 3,667584 | 0,021624 | 1        |                                                                                                         |
| GTF2H2B        | ENSG00000226259 | pseudogene     | 55,70449294 | 158,1042311 | 2,838267125 | 1,50501  | 0,026552 | 1        | general transcription factor IIH, polypeptide 2B (pseudogene) [Source:HGNC Symbol;Acc:31393]            |
| FTLP3          | ENSG00000226608 | pseudogene     | 933,9881278 | 368,4890107 | 0,394532864 | -1,34178 | 0,027057 | 1        | ferritin, light polypeptide pseudogene 3 [Source:HGNC Symbol;Acc:4000]                                  |
| RP11-195E2.1   | ENSG00000230847 | pseudogene     | 26,42190242 | 78,36990044 | 2,966096052 | 1,568565 | 0,027394 | 1        |                                                                                                         |
| AP001065.7     | ENSG00000224747 | pseudogene     | 4,111466617 | 21,73939955 | 5,28750482  | 2,402587 | 0,02984  | 1        |                                                                                                         |
| COL6A4P2       | ENSG00000228252 | pseudogene     | 139,2047318 | 350,1633979 | 2,515456143 | 1,33082  | 0,030013 | 1        | collagen, type VI, alpha 4 pseudogene 2 [Source:HGNC Symbol;Acc:38501]                                  |
| PI4KAP1        | ENSG00000215513 | pseudogene     | 727,6766905 | 1800,130449 | 2,473805293 | 1,306732 | 0,031809 | 1        | phosphatidylinositol 4-kinase, catalytic, alpha pseudogene 1 [Source:HGNC Symbol;Acc:33576]             |
| UBE2FP1        | ENSG00000224080 | pseudogene     | 29,16757671 | 3,588682416 | 0,123036701 | -3,02284 | 0,032912 | 1        | ubiquitin-conjugating enzyme E2F (putative) pseudogene 1 [Source:HGNC Symbol;Acc:44535]                 |
| RP11-707O23.5  | ENSG00000263503 | pseudogene     | 11,34384108 | 37,18840426 | 3,278290308 | 1,712944 | 0,033303 | 1        |                                                                                                         |
| AC010984.3     | ENSG00000230646 | pseudogene     | 0           | 6,98026039  | #N/A        | #N/A     | 0,033434 | 1        |                                                                                                         |
| RP11-1166P10.1 | ENSG00000260628 | pseudogene     | 18,69122936 | 4,283648271 | 0,229179589 | -2,12545 | 0,036006 | 1        |                                                                                                         |
| AC108463.2     | ENSG00000227992 | pseudogene     | 33,65025126 | 9,666671895 | 0,287268937 | -1,79953 | 0,036314 | 1        |                                                                                                         |
| RP11-22823.1   | ENSG00000111788 | pseudogene     | 171,2309839 | 421,3779811 | 2,460874613 | 1,299171 | 0,036371 | 1        |                                                                                                         |
| TAGLN2P1       | ENSG00000253676 | pseudogene     | 268,4656327 | 105,767591  | 0,393970647 | -1,34384 | 0,037602 | 1        | transgelin 2 pseudogene 1 [Source:HGNC Symbol;Acc:21739]                                                |
| DUTP1          | ENSG00000229048 | pseudogene     | 5,981595956 | 0           | 0           | #N/A     | 0,039016 | 1        | deoxyuridine triphosphatase pseudogene 1 [Source:HGNC Symbol;Acc:31956]                                 |
| RANP4          | ENSG00000225125 | pseudogene     | 10,71643902 | 37,58771345 | 3,507481673 | 1,810436 | 0,039215 | 1        | RAN, member RAS oncogene family pseudogene 4 [Source:HGNC Symbol;Acc:39859]                             |
| RP11-255H23.2  | ENSG00000233836 | pseudogene     | 19,31058019 | 62,0033239  | 3,210847281 | 1,682954 | 0,041954 | 1        |                                                                                                         |
| FTL2P          | ENSG00000232368 | pseudogene     | 354,9435863 | 149,2157763 | 0,420392936 | -1,25019 | 0,043308 | 1        | ferritin, light polypeptide pseudogene 2 [Source:HGNC Symbol;Acc:4001]                                  |
| ZNF204P        | ENSG00000204789 | pseudogene     | 228,0672159 | 529,3069623 | 2,320837567 | 1,214646 | 0,044052 | 1        | zinc finger protein 204, pseudogene [Source:HGNC Symbol;Acc:12995]                                      |
| OR7E38P        | ENSG00000183444 | pseudogene     | 73,89943651 | 28,69958771 | 0,388355583 | -1,36455 | 0,044932 | 1        | olfactory receptor, family 7, subfamily E, member 38 pseudogene [Source:HGNC Symbol;Acc:8411]           |
| KRT18P24       | ENSG00000226234 | pseudogene     | 7,476491743 | 0,497861413 | 0,066590244 | -3,90855 | 0,046051 | 1        | keratin 18 pseudogene 24 [Source:HGNC Symbol;Acc:33393]                                                 |
| SPATA31C1      | ENSG00000230246 | pseudogene     | 0,498298596 | 10,47549089 | 21,02251738 | 4,393864 | 0,046365 | 1        | SPATA31 subfamily C, member 1 [Source:HGNC Symbol;Acc:27846]                                            |
| KRT18P36       | ENSG00000226246 | pseudogene     | 7,351413892 | 0,497861413 | 0,067723219 | -3,88421 | 0,046807 | 1        | keratin 18 pseudogene 36 [Source:HGNC Symbol;Acc:33405]                                                 |
| RP11-706O15.5  | ENSG00000205663 | lincRNA        | 3,114869425 | 164,1295711 | 52,69227973 | 5,71952  | 1,54E-10 | 1,02E-06 |                                                                                                         |
| AC104135.3     | ENSG00000204792 | lincRNA        | 92,83679595 | 1,493584238 | 0,016088279 | -5,95785 | 7,87E-10 | 4,46E-06 |                                                                                                         |
| RP11-138B4.1   | ENSG00000250658 | lincRNA        | 0,498298596 | 73,98259964 | 148,4704157 | 7,214032 | 4,57E-09 | 2,27E-05 |                                                                                                         |
| RP11-11N5.1    | ENSG00000250829 | lincRNA        | 0           | 46,1601103  | #N/A        | #N/A     | 1,04E-07 | 0,000456 |                                                                                                         |

|                 |                 |                        |             |             |             |          |          |          |                                                                                      |
|-----------------|-----------------|------------------------|-------------|-------------|-------------|----------|----------|----------|--------------------------------------------------------------------------------------|
| SNORD116-20     | ENSG00000261069 | lincRNA                | 68,79338551 | 6,876607862 | 0,099960306 | -3,3225  | 5,47E-05 | 0,108307 | small nucleolar RNA, C/D box 116-20 [Source:HGNC Symbol;Acc:33086]                   |
| RP11-262H14.3   | ENSG00000234665 | lincRNA                | 0           | 19,44719693 | #N/A        | #N/A     | 0,000175 | 0,231458 |                                                                                      |
| LINC00152       | ENSG00000222041 | lincRNA                | 233,2963319 | 56,49624652 | 0,242165173 | -2,04594 | 0,001308 | 0,942256 | long intergenic non-protein coding RNA 152 [Source:HGNC Symbol;Acc:28717]            |
| MIR4435-1HG     | ENSG00000172965 | lincRNA                | 351,4494577 | 93,16638814 | 0,265091853 | -1,91544 | 0,002068 | 1        | MIR4435-1 host gene (non-protein coding) [Source:HGNC Symbol;Acc:35163]              |
| RP13-977J11.2   | ENSG00000265676 | lincRNA                | 0,623376446 | 18,03686399 | 28,93414421 | 4,854701 | 0,002449 | 1        |                                                                                      |
| RP11-545G3.1    | ENSG00000241449 | lincRNA                | 1,246752893 | 22,54311824 | 18,08146456 | 4,17644  | 0,002625 | 1        |                                                                                      |
| KLHL7-AS1       | ENSG00000230658 | lincRNA                | 7,726647444 | 45,26804    | 5,858691021 | 2,550578 | 0,003336 | 1        | KLHL7 antisense RNA 1 (head to head) [Source:HGNC Symbol;Acc:43431]                  |
| RP11-262H14.4   | ENSG00000170161 | lincRNA                | 5,235154466 | 32,5054468  | 6,209071196 | 2,634377 | 0,004997 | 1        |                                                                                      |
| LINC00890       | ENSG00000260802 | lincRNA                | 194,4048878 | 62,84949143 | 0,323291725 | -1,62909 | 0,007016 | 1        | long intergenic non-protein coding RNA 890 [Source:HGNC Symbol;Acc:48576]            |
| RP4-610C12.4    | ENSG00000205611 | lincRNA                | 17,06924291 | 73,59349106 | 4,311467793 | 2,108179 | 0,007191 | 1        |                                                                                      |
| RP11-1055B8.4   | ENSG00000262877 | lincRNA                | 123,997567  | 377,7887828 | 3,046743511 | 1,607268 | 0,009964 | 1        |                                                                                      |
| LINC00565       | ENSG00000260910 | lincRNA                | 24,79991597 | 4,086543829 | 0,164780551 | -2,60138 | 0,010192 | 1        | long intergenic non-protein coding RNA 565 [Source:HGNC Symbol;Acc:43709]            |
| LRCOL1          | ENSG00000204583 | lincRNA                | 3,986388766 | 41,1967971  | 10,33436514 | 3,369378 | 0,01108  | 1        | leucine rich colipase-like 1 [Source:HGNC Symbol;Acc:44160]                          |
| RP11-18707.3    | ENSG00000259124 | lincRNA                | 0           | 9,676872508 | #N/A        | #N/A     | 0,014098 | 1        |                                                                                      |
| RP11-1898A.6    | ENSG00000231817 | lincRNA                | 24,3076558  | 289,7097616 | 11,91845746 | 3,575126 | 0,016913 | 1        |                                                                                      |
| RP11-689P11.2   | ENSG00000205959 | lincRNA                | 31,28584894 | 94,4306197  | 3,018317319 | 1,593744 | 0,017737 | 1        |                                                                                      |
| CTB-175P5.4     | ENSG00000269416 | lincRNA                | 160,8917912 | 440,2916145 | 2,736569785 | 1,452369 | 0,019412 | 1        |                                                                                      |
| RP11-426L16.8   | ENSG00000215866 | lincRNA                | 1,619973638 | 14,06417331 | 8,681729738 | 3,117983 | 0,023844 | 1        |                                                                                      |
| ZNF667-AS1      | ENSG00000166770 | lincRNA                | 70,260102   | 245,6225407 | 3,495903561 | 1,805665 | 0,02678  | 1        | ZNF667 antisense RNA 1 (head to head) [Source:HGNC Symbol;Acc:44321]                 |
| CTD-2545M3.8    | ENSG00000268518 | lincRNA                | 53,70526014 | 9,780525036 | 0,182114843 | -2,45708 | 0,027016 | 1        |                                                                                      |
| RP11-315I14.2   | ENSG00000233906 | lincRNA                | 8,598166785 | 0,399309191 | 0,046441201 | -4,42845 | 0,028426 | 1        |                                                                                      |
| RP11-1680I.6.1  | ENSG00000229191 | lincRNA                | 66,66504924 | 179,8895334 | 2,698408468 | 1,432109 | 0,033072 | 1        |                                                                                      |
| RP4-669L17.10   | ENSG00000237094 | lincRNA                | 12,83873687 | 40,97929143 | 3,191847598 | 1,674392 | 0,034646 | 1        |                                                                                      |
| RP11-470L19.2   | ENSG00000235407 | lincRNA                | 13,83130844 | 2,292202621 | 0,165725653 | -2,59313 | 0,035226 | 1        |                                                                                      |
| RP11-509J21.3   | ENSG00000235326 | lincRNA                | 5,858530912 | 33,41791832 | 5,704146453 | 2,512011 | 0,035825 | 1        |                                                                                      |
| RP11-660D17.3   | ENSG00000237588 | lincRNA                | 5,110076615 | 22,04015652 | 4,31307751  | 2,108718 | 0,036417 | 1        |                                                                                      |
| RP11-809C9.2    | ENSG00000258102 | lincRNA                | 3,613168021 | 37,41101024 | 10,35407433 | 3,372127 | 0,036892 | 1        |                                                                                      |
| LINC00312       | ENSG00000237697 | lincRNA                | 220,7178148 | 89,89376362 | 0,407279148 | -1,29591 | 0,038309 | 1        | long intergenic non-protein coding RNA 312 [Source:HGNC Symbol;Acc:6662]             |
| KBTBD11-OT1     | ENSG00000253696 | lincRNA                | 7,353426699 | 27,42318015 | 3,72930625  | 1,898907 | 0,039333 | 1        | KBTBD11 overlapping transcript 1 (non-protein coding) [Source:HGNC Symbol;Acc:49147] |
| AC159540.1      | ENSG00000230606 | lincRNA                | 203,1402092 | 83,31791272 | 0,410149783 | -1,28578 | 0,039507 | 1        |                                                                                      |
| RP11-63P12.6    | ENSG00000225434 | lincRNA                | 10,84151687 | 1,395032017 | 0,128674985 | -2,9582  | 0,041528 | 1        |                                                                                      |
| AC069513.4      | ENSG00000229178 | lincRNA                | 4,486700169 | 20,72837581 | 4,619960111 | 2,20788  | 0,042882 | 1        |                                                                                      |
| RP4-760C5.3     | ENSG00000231081 | lincRNA                | 0           | 6,383846756 | #N/A        | #N/A     | 0,043153 | 1        |                                                                                      |
| RP11-662J14.2   | ENSG00000258480 | lincRNA                | 0           | 6,285294535 | #N/A        | #N/A     | 0,044267 | 1        |                                                                                      |
| RP11-849I19.1   | ENSG00000263146 | lincRNA                | 43,37411871 | 106,1193391 | 2,446605078 | 1,290781 | 0,044949 | 1        |                                                                                      |
| AP000997.2      | ENSG00000260254 | lincRNA                | 0,996597191 | 10,56894281 | 10,60502969 | 3,406677 | 0,045229 | 1        |                                                                                      |
| RP11-420G6.4    | ENSG00000230438 | lincRNA                | 4,984998764 | 24,11485347 | 4,837484343 | 2,274257 | 0,047108 | 1        |                                                                                      |
| RP4-610C12.3    | ENSG00000225490 | lincRNA                | 6,853115297 | 26,03324844 | 3,798746601 | 1,925523 | 0,047732 | 1        |                                                                                      |
| RP11-108M12.3   | ENSG00000258592 | lincRNA                | 15,08208695 | 2,592959591 | 0,17192313  | -2,54016 | 0,048513 | 1        |                                                                                      |
| RP11-195E2.4    | ENSG00000254353 | lincRNA                | 50,48141532 | 129,1603187 | 2,558571663 | 1,355339 | 0,048549 | 1        |                                                                                      |
| CTD-2127H9.1    | ENSG00000249740 | lincRNA                | 5,733453061 | 0           | 0           | #N/A     | 0,049935 | 1        |                                                                                      |
| HOTAIRM1        | ENSG00000233429 | antisense              | 227,7141232 | 1003,611262 | 4,407329894 | 2,139905 | 0,000435 | 0,43118  | HOXA transcript antisense RNA, myeloid-specific 1 [Source:HGNC Symbol;Acc:37117]     |
| MRPL23-AS1      | ENSG00000226416 | antisense              | 16,69803497 | 88,06717417 | 5,274104067 | 2,398926 | 0,002215 | 1        | MRPL23 antisense RNA 1 [Source:HGNC Symbol;Acc:42812]                                |
| NPPA-AS1        | ENSG00000242349 | antisense              | 85,74962741 | 19,22969126 | 0,224253934 | -2,15679 | 0,002959 | 1        | NPPA antisense RNA 1 [Source:HGNC Symbol;Acc:37635]                                  |
| RP11-5407.11    | ENSG00000224969 | antisense              | 7,476491743 | 45,07093556 | 6,028353553 | 2,591764 | 0,003403 | 1        |                                                                                      |
| TMEM254-AS1     | ENSG00000230091 | antisense              | 211,1290892 | 57,1283623  | 0,270584989 | -1,88585 | 0,004812 | 1        | TMEM254 antisense RNA 1 [Source:HGNC Symbol;Acc:27340]                               |
| RP11-421F16.3   | ENSG00000247903 | antisense              | 78,52127856 | 251,7770348 | 3,206481599 | 1,680991 | 0,007308 | 1        |                                                                                      |
| RP11-1060I15.4  | ENSG00000256377 | antisense              | 19,81693001 | 2,095098178 | 0,105722641 | -3,24164 | 0,008078 | 1        |                                                                                      |
| FAM85B          | ENSG00000253893 | antisense              | 2,368427935 | 19,73775329 | 8,333693838 | 3,058956 | 0,00942  | 1        | family with sequence similarity 85, member B [Source:HGNC Symbol;Acc:32160]          |
| AC116614.1      | ENSG00000235688 | antisense              | 4,486700169 | 32,71785216 | 7,292186001 | 2,866351 | 0,012655 | 1        |                                                                                      |
| DICER1-AS1      | ENSG00000235706 | antisense              | 102,8208831 | 294,3009136 | 2,862267903 | 1,517159 | 0,013776 | 1        | DICER1 antisense RNA 1 [Source:HGNC Symbol;Acc:43017]                                |
| RP11-796E2.4    | ENSG00000245904 | antisense              | 12,96180191 | 54,26014727 | 4,186157731 | 2,065627 | 0,015084 | 1        |                                                                                      |
| RP11-909N17.2   | ENSG00000253931 | antisense              | 7,974790339 | 35,80357286 | 4,489594251 | 2,166585 | 0,016514 | 1        |                                                                                      |
| CTC-559E9.8     | ENSG00000267565 | antisense              | 11,33780266 | 45,55859636 | 4,018291527 | 2,006582 | 0,022124 | 1        |                                                                                      |
| ACTA2-AS1       | ENSG00000180139 | antisense              | 27,79172035 | 6,378746449 | 0,229519669 | -2,12331 | 0,023156 | 1        | ACTA2 antisense RNA 1 [Source:HGNC Symbol;Acc:45169]                                 |
| CTD-2314G24.2   | ENSG00000259663 | antisense              | 19,81089159 | 67,00233925 | 3,382096103 | 1,757918 | 0,025564 | 1        |                                                                                      |
| KANSL1-AS1      | ENSG00000214401 | antisense              | 9,471698933 | 36,38468557 | 3,841410694 | 1,941636 | 0,02715  | 1        | KANSL1 antisense RNA 1 [Source:HGNC Symbol;Acc:43740]                                |
| FOXD2-AS1       | ENSG00000237424 | antisense              | 24,54774746 | 76,48720762 | 3,115854428 | 1,639628 | 0,027361 | 1        | FOXD2 antisense RNA 1 (head to head) [Source:HGNC Symbol;Acc:44256]                  |
| RP11-685N10.1   | ENSG00000255893 | antisense              | 21,8101244  | 4,584405241 | 0,210196199 | -2,25019 | 0,028488 | 1        |                                                                                      |
| MYLK-AS2        | ENSG00000250174 | antisense              | 0           | 7,182465139 | #N/A        | #N/A     | 0,028668 | 1        | MYLK antisense RNA 2 [Source:HGNC Symbol;Acc:40387]                                  |
| AC007277.3      | ENSG00000213981 | antisense              | 4,859920914 | 22,73002227 | 4,677035383 | 2,225594 | 0,035446 | 1        |                                                                                      |
| ST7-AS1         | ENSG00000227199 | antisense              | 30,90256416 | 88,34242961 | 2,858741079 | 1,51538  | 0,038221 | 1        | ST7 antisense RNA 1 [Source:HGNC Symbol;Acc:16000]                                   |
| RP11-524D16_A.3 | ENSG00000261295 | antisense              | 20,44030646 | 4,682957462 | 0,229104073 | -2,12592 | 0,040699 | 1        |                                                                                      |
| RP11-142C4.6    | ENSG00000255240 | antisense              | 9,596776783 | 32,11633822 | 3,346575517 | 1,742686 | 0,041737 | 1        |                                                                                      |
| AC108488.3      | ENSG00000234171 | antisense              | 193,0370826 | 79,05466568 | 0,40953098  | -1,28796 | 0,041788 | 1        |                                                                                      |
| RP4-758I18.7    | ENSG00000225905 | antisense              | 0,498298596 | 8,478944934 | 17,01579135 | 4,088802 | 0,045387 | 1        |                                                                                      |
| RP11-617D20.1   | ENSG00000231160 | antisense              | 48,10292335 | 161,2919579 | 3,353059371 | 1,745478 | 0,048987 | 1        |                                                                                      |
| RP11-494M8.4    | ENSG00000254951 | sense_overlapping      | 10,46829612 | 0           | 0           | #N/A     | 0,003942 | 1        |                                                                                      |
| CTD-2240H23.2   | ENSG00000259143 | sense_overlapping      | 38,75227665 | 108,5576431 | 2,801322979 | 1,486108 | 0,04081  | 1        |                                                                                      |
| RP11-150O12.6   | ENSG00000253414 | sense_intronic         | 22,5605915  | 2,489307063 | 0,110338732 | -3,17999 | 0,010024 | 1        |                                                                                      |
| RP11-31F19.1    | ENSG00000226403 | sense_intronic         | 13,83533406 | 2,193650399 | 0,158554206 | -2,65695 | 0,046606 | 1        |                                                                                      |
| RN7SL128P       | ENSG00000240869 | misc_RNA               | 6,106673806 | 30,11979226 | 4,932274626 | 2,302253 | 0,01411  | 1        | RNA, 75L, cytoplasmic 128, pseudogene [Source:HGNC Symbol;Acc:46144]                 |
| RN7SL4P         | ENSG00000263740 | misc_RNA               | 31,28383614 | 97,03888021 | 3,10188558  | 1,633145 | 0,01567  | 1        | RNA, 75L, cytoplasmic 4, pseudogene [Source:HGNC Symbol;Acc:10039]                   |
| SLC38A3         | ENSG00000188338 | processed_transcript   | 43,61823599 | 135,6019153 | 3,10883538  | 1,636374 | 0,015535 | 1        | solute carrier family 38, member 3 [Source:HGNC Symbol;Acc:18044]                    |
| GRIP2           | ENSG00000144596 | processed_transcript   | 183,8437187 | 445,1071799 | 2,421117148 | 1,275673 | 0,028549 | 1        | glutamate receptor interacting protein 2 [Source:HGNC Symbol;Acc:23841]              |
| FAM182A         | ENSG00000125804 | processed_transcript   | 0,996597191 | 40,11272266 | 40,24968463 | 5,330906 | 0,045056 | 1        | family with sequence similarity 182, member A [Source:HGNC Symbol;Acc:16222]         |
| MIR3188         | ENSG00000267959 | miRNA                  | 6,106673806 | 29,99573851 | 4,91196017  | 2,296299 | 0,02318  | 1        | microRNA 3188 [Source:HGNC Symbol;Acc:38226]                                         |
| ACTN3           | ENSG00000248746 | polymorphic_pseudogene | 161,1157804 | 1782,135032 | 11,06120721 | 3,467437 | 0,034359 | 1        | actinin, alpha 3 (gene/pseudogene) [Source:HGNC Symbol;Acc:165]                      |



**Table S3. Mean expression levels of selected transcripts**

| <b>Gene_Name</b> | <b>Ensembl_GeneID</b> | <b>Norm_Expr_CTR</b> | <b>Norm_Expr_PD</b> | <b>Fold Change</b> | <b>Log2FC</b> | <b>p-Value</b> | <b>FDR</b> |
|------------------|-----------------------|----------------------|---------------------|--------------------|---------------|----------------|------------|
| NRK              | ENSG00000123572       | 358,8756293          | 119,931951          | 0,334188062        | -1,58127      | 0,047948       | 1          |
| GABRQ            | ENSG00000147402       | 24,29960457          | 90,56158154         | 3,726874702        | 1,897966      | 0,010639       | 1          |
| SYNPO            | ENSG00000171992       | 1820,720982          | 858,8502539         | 0,471708879        | -1,08403      | 0,048855       | 1          |
| GRID1            | ENSG00000182771       | 179,3429289          | 69,79750359         | 0,389184586        | -1,36147      | 0,041057       | 1          |
| ROBO1            | ENSG00000169855       | 2163,604478          | 4790,523607         | 2,21414018         | 1,146747      | 0,048824       | 1          |
| SYT7             | ENSG00000011347       | 153,4173123          | 437,9637097         | 2,854721565        | 1,51335       | 0,015105       | 1          |
| FLRT2            | ENSG00000185070       | 4883,326574          | 2112,195619         | 0,432532125        | -1,20912      | 0,028656       | 1          |
| CA7              | ENSG00000168748       | 0,996597191          | 17,24334592         | 17,30222207        | 4,112885      | 0,005405       | 1          |
| TYW3             | ENSG00000162623       | 821,2679792          | 2,292202621         | 0,002791053        | -8,48497      | 5,56E-21       | 2,2E-16    |
| CRYZ             | ENSG00000116791       | 2082,900517          | 23,60679145         | 0,011333614        | -6,46325      | 8,7E-18        | 1,72E-13   |
| NEUROD1          | ENSG00000162992       | 30,91061539          | 255,4473221         | 8,264064591        | 3,046852      | 0,00271        | 1          |
| NEUROG1          | ENSG00000181965       | 27,91881101          | 225,2493789         | 8,068014745        | 3,012214      | 0,017308       | 1          |
| NEUROG2          | ENSG00000178403       | 60,31627096          | 160,2299311         | 2,656495976        | 1,409525      | 0,033535       | 1          |

Table S4: Metabolism genes differentially expressed in PD NPCs

| Gene Name | Ensembl ID      | Fold Change  | P Value     |
|-----------|-----------------|--------------|-------------|
| TYW3      | ENSG00000162623 | -358.2876888 | 5.55695E-21 |
| CRYZ      | ENSG00000116791 | -88.23310536 | 8.69542E-18 |
| ALOX15B   | ENSG00000179593 | -10.96044941 | 0.002391622 |
| GLIPR1    | ENSG00000139278 | -5.789328554 | 0.008093524 |
| CERS3     | ENSG00000154227 | -5.679220316 | 0.046034028 |
| NPPA      | ENSG00000175206 | -4.81276838  | 0.021750623 |
| PON1      | ENSG00000005421 | -4.747907922 | 0.049637821 |
| NNMT      | ENSG00000166741 | -4.712467017 | 0.003097069 |
| AGPAT9    | ENSG00000138678 | -4.56615704  | 0.00234267  |
| PTGR1     | ENSG00000106853 | -3.880024692 | 0.001216553 |
| NQO1      | ENSG00000181019 | -3.601718303 | 0.01461021  |
| GBP1      | ENSG00000117228 | -3.496958894 | 0.011255777 |
| ADM       | ENSG00000148926 | -3.314921756 | 0.006712054 |
| MT1X      | ENSG00000187193 | -2.936745147 | 0.036310079 |
| SGMS2     | ENSG00000164023 | -2.811229932 | 0.01449496  |
| C8orf47   | ENSG00000177459 | -2.744087551 | 0.041808012 |
| GCLM      | ENSG00000023909 | -2.646676561 | 0.017963359 |
| MT2A      | ENSG00000125148 | -2.615028823 | 0.045706868 |
| ME1       | ENSG00000065833 | -2.552089519 | 0.018529803 |
| GBP2      | ENSG00000162645 | -2.515165983 | 0.032366983 |
| MT1F      | ENSG00000198417 | -2.504536598 | 0.049413631 |
| FTL       | ENSG00000087086 | -2.388339884 | 0.036358478 |
| TYRP1     | ENSG00000107165 | -2.353426179 | 0.042392464 |
| RARRES2   | ENSG00000106538 | 2.436248962  | 0.03247455  |
| LPAR6     | ENSG00000139679 | 2.440261781  | 0.036650243 |
| SLC25A27  | ENSG00000153291 | 2.479652827  | 0.027245583 |
| ATP8A1    | ENSG00000124406 | 2.512054923  | 0.048633584 |
| ADSSL1    | ENSG00000185100 | 2.557635784  | 0.032336745 |
| ALPL      | ENSG00000162551 | 2.622445675  | 0.023642969 |
| LOXL3     | ENSG00000115318 | 2.635309735  | 0.031876936 |
| PLCG2     | ENSG00000197943 | 2.651948423  | 0.033817974 |
| SULT4A1   | ENSG00000130540 | 2.807734816  | 0.036742355 |
| CHST6     | ENSG00000183196 | 2.898144984  | 0.034269525 |
| PCBP3     | ENSG00000183570 | 2.937316305  | 0.043502172 |
| TXNRD2    | ENSG00000184470 | 3.081689229  | 0.019533308 |
| GLYATL2   | ENSG00000156689 | 3.13347574   | 0.027466881 |
| PTGS1     | ENSG00000095303 | 3.312172748  | 0.014517288 |
| HSD11B2   | ENSG00000176387 | 3.404682643  | 0.041661168 |
| CLEC18C   | ENSG00000157335 | 3.455942627  | 0.035127595 |
| FGF19     | ENSG00000162344 | 3.587461678  | 0.00642645  |
| SELV      | ENSG00000186838 | 3.844732878  | 0.016689422 |
| MPPED1    | ENSG00000186732 | 3.987888575  | 0.026383513 |
| OAS3      | ENSG00000111331 | 4.31083521   | 0.016880971 |
| GCKR      | ENSG00000084734 | 4.400305983  | 0.045692123 |

|          |                 |             |             |
|----------|-----------------|-------------|-------------|
| LDHD     | ENSG00000166816 | 5.408713699 | 0.005267177 |
| CRIP3    | ENSG00000146215 | 6.129611905 | 0.002701273 |
| SLC25A41 | ENSG00000181240 | 6.327857186 | 0.000369596 |
| IAH1     | ENSG00000134330 | 6.568371109 | 0.003128166 |
| CLEC19A  | ENSG00000261210 | 7.595967453 | 0.03595115  |
| CA7      | ENSG00000168748 | 17.30222207 | 0.005404687 |



Table S5: Differentiation and development genes differentially expressed in PD NPCs

| Gene Name | Ensembl ID      | Fold Change  | P Value     |
|-----------|-----------------|--------------|-------------|
| GDF3      | ENSG00000184344 | -19.7784609  | 0.020208572 |
| OSGIN1    | ENSG00000140961 | -4.254543149 | 0.004522714 |
| OGN       | ENSG00000106809 | -3.64454594  | 0.030626325 |
| NELL1     | ENSG00000165973 | -3.054963518 | 0.007379073 |
| EDN1      | ENSG00000078401 | -3.040441542 | 0.023771623 |
| GBP4      | ENSG00000162654 | -2.569345675 | 0.027054243 |
| YPEL1     | ENSG00000100027 | 2.388812142  | 0.033124823 |
| CHRD1     | ENSG00000101938 | 2.394255823  | 0.049273684 |
| ERBB3     | ENSG00000065361 | 2.491644739  | 0.022412989 |
| EFNA2     | ENSG00000099617 | 2.6039268    | 0.036556641 |
| SOX8      | ENSG00000005513 | 2.608236077  | 0.026364651 |
| NEUROG2   | ENSG00000178403 | 2.656495976  | 0.033535267 |
| CECR1     | ENSG00000093072 | 3.028259906  | 0.041688725 |
| DTX1      | ENSG00000135144 | 3.13293344   | 0.025339592 |
| HEYL      | ENSG00000163909 | 3.242285646  | 0.009112501 |
| EYA2      | ENSG00000064655 | 3.303160502  | 0.016748188 |
| LAPTM5    | ENSG00000162511 | 3.710498843  | 0.026363452 |
| POU4F1    | ENSG00000152192 | 3.771616001  | 0.002346524 |
| WIF1      | ENSG00000156076 | 3.936196322  | 0.041899595 |
| LGI4      | ENSG00000153902 | 4.031282321  | 0.001981302 |
| NTRK1     | ENSG00000198400 | 4.306336836  | 0.002167139 |
| FOXD3     | ENSG00000187140 | 4.436183895  | 0.031795119 |
| ISLR2     | ENSG00000167178 | 4.43665464   | 0.03120838  |
| DCDC2     | ENSG00000146038 | 4.74519173   | 0.001158024 |
| FOXN4     | ENSG00000139445 | 5.121896246  | 0.002378932 |
| C1orf111  | ENSG00000171722 | 5.327106125  | 0.025977285 |
| NTN5      | ENSG00000142233 | 5.450933318  | 0.023027582 |
| NOTUM     | ENSG00000185269 | 5.619951989  | 0.000402492 |
| CRHR1     | ENSG00000120088 | 6.356920716  | 0.001353505 |
| NEUROG1   | ENSG00000181965 | 8.068014745  | 0.017307738 |
| MAATS1    | ENSG00000183833 | 8.116360465  | 0.033476156 |
| NEUROD1   | ENSG00000162992 | 8.264064591  | 0.002709899 |

Table S6: Ion Channels and transporters genes differentially expressed in PD NPCs

| Gene Name | Ensembl ID      | Fold Change  | P Value     |
|-----------|-----------------|--------------|-------------|
| BEST3     | ENSG00000127325 | -7.592920769 | 0.007234843 |
| KCNE4     | ENSG00000152049 | -6.062222787 | 0.028434074 |
| KCNJ15    | ENSG00000157551 | -4.206616993 | 0.041666306 |
| KCNAB3    | ENSG00000170049 | 2.476934922  | 0.03173247  |
| KCNQ2     | ENSG00000075043 | 2.757709313  | 0.044531124 |
| KCNC1     | ENSG00000129159 | 2.779455197  | 0.021826856 |
| SLC38A3   | ENSG00000188338 | 3.10883538   | 0.015534549 |
| KCNQ4     | ENSG00000117013 | 3.37747974   | 0.045691928 |
| KCNK5     | ENSG00000164626 | 3.432348566  | 0.005808151 |
| CACNG6    | ENSG00000130433 | 3.833789078  | 0.039525831 |
| BEST4     | ENSG00000142959 | 3.904577795  | 0.041233713 |
| KCNQ1     | ENSG00000053918 | 4.110293874  | 0.015587053 |
| KCNH6     | ENSG00000173826 | 7.910264198  | 0.005683123 |

Table S7: Cytoskeleton genes differentially expressed in PD NPCs

| Gene Name | Ensembl ID      | Fold Change  | P Value     |
|-----------|-----------------|--------------|-------------|
| ACTG2     | ENSG00000163017 | -9.512168282 | 2.70154E-07 |
| TAGLN     | ENSG00000149591 | -5.195740077 | 7.89406E-05 |
| UPK1B     | ENSG00000114638 | -5.164231465 | 0.004127269 |
| PALMD     | ENSG00000099260 | -4.1395118   | 0.002380045 |
| ACTA2     | ENSG00000107796 | -4.018529289 | 0.000789845 |
| MYH6      | ENSG00000197616 | -3.93316987  | 0.045736589 |
| SYNM      | ENSG00000182253 | -3.335647775 | 0.008319921 |
| PDLIM3    | ENSG00000154553 | -3.247964637 | 0.017971558 |
| NRK       | ENSG00000123572 | -2.992327119 | 0.047948388 |
| MAP7D3    | ENSG00000129680 | -2.649763506 | 0.021541752 |
| MYOM2     | ENSG00000036448 | -2.535778723 | 0.034178157 |
| SYNPO     | ENSG00000171992 | -2.119951614 | 0.048854522 |
| THSD7B    | ENSG00000144229 | 2.760013134  | 0.019674973 |
| TEKT3     | ENSG00000125409 | 2.894101715  | 0.049186939 |
| TTLL6     | ENSG00000170703 | 3.078139718  | 0.045391137 |
| DNAH2     | ENSG00000183914 | 3.325797689  | 0.006786459 |
| JAKMIP1   | ENSG00000152969 | 5.20252008   | 0.0221527   |
| SAMSN1    | ENSG00000155307 | 13.67514708  | 0.003892129 |

Table S8: Cell adhesion and ECM genes differentially expressed in PD NPCs

| GENE_NAME | Gene_ID         | foldChange_Easy | PValue      |
|-----------|-----------------|-----------------|-------------|
| CTHRC1    | ENSG00000164932 | -9.821087576    | 7.32935E-05 |
| ZP3       | ENSG00000188372 | -7.586842856    | 0.001262508 |
| SPP1      | ENSG00000118785 | -4.126368165    | 0.000806018 |
| TNC       | ENSG00000041982 | -3.806591353    | 0.001039882 |
| TNFRSF12A | ENSG00000006327 | -3.752375047    | 0.009520479 |
| ADAMTS16  | ENSG00000145536 | -3.087351233    | 0.017423181 |
| SERPINB8  | ENSG00000166401 | -2.926149315    | 0.019458065 |
| LAMC2     | ENSG00000058085 | -2.880063533    | 0.011048531 |
| CRYAB     | ENSG00000109846 | -2.43292528     | 0.045777113 |
| TAGLN2    | ENSG00000158710 | -2.302407879    | 0.044954293 |
| FAM184A   | ENSG00000111879 | 2.26483951      | 0.046989494 |
| NKD2      | ENSG00000145506 | 2.295865616     | 0.04556459  |
| COL9A2    | ENSG00000049089 | 2.310379664     | 0.035700122 |
| CDH23     | ENSG00000107736 | 2.82314754      | 0.019080159 |
| FLRT1     | ENSG00000126500 | 2.842617557     | 0.032092894 |
| CDH15     | ENSG00000129910 | 3.006389201     | 0.04807502  |
| ITGA4     | ENSG00000115232 | 3.165026731     | 0.021486217 |
| NXPH3     | ENSG00000182575 | 3.222671774     | 0.031451081 |
| ADAMTS4   | ENSG00000158859 | 3.324561207     | 0.014936464 |
| CGREF1    | ENSG00000138028 | 3.368264776     | 0.029006964 |
| CDHR2     | ENSG00000074276 | 3.374616153     | 0.01331885  |
| ITGA2B    | ENSG00000005961 | 5.661234457     | 0.000263149 |
| COL11A2   | ENSG00000204248 | 6.116583841     | 0.005391696 |
| ART5      | ENSG00000167311 | 6.490506413     | 0.000426201 |
| PCDHA6    | ENSG00000081842 | 14.90708        | 2.62655E-07 |

Table S9: Synapse genes differentially expressed in PD NPCs

| Gene Name | Ensembl ID      | Fold Change  | P Value     |
|-----------|-----------------|--------------|-------------|
| SLITRK4   | ENSG00000179542 | -3.12760297  | 0.046533977 |
| GRID1     | ENSG00000182771 | -2.569474833 | 0.041057084 |
| FLRT2     | ENSG00000185070 | -2.311967003 | 0.028655985 |
| ROBO1     | ENSG00000169855 | 2.21414018   | 0.048823714 |
| GLRB      | ENSG00000109738 | 2.267682541  | 0.04844259  |
| GRIP2     | ENSG00000144596 | 2.421117148  | 0.02854949  |
| PRRT1     | ENSG00000204314 | 2.43041459   | 0.037458522 |
| CHRNA4    | ENSG00000117971 | 2.704193211  | 0.028629695 |
| SYCP2L    | ENSG00000153157 | 2.8506323    | 0.021811882 |
| SYT7      | ENSG00000011347 | 2.854721565  | 0.015104993 |
| PRKG2     | ENSG00000138669 | 2.916158816  | 0.041998645 |
| DOC2A     | ENSG00000149927 | 2.98289427   | 0.028019024 |
| CADM2     | ENSG00000175161 | 3.079221913  | 0.012164982 |
| GRIK4     | ENSG00000149403 | 3.244705989  | 0.018435817 |
| GABRQ     | ENSG00000147402 | 3.726874702  | 0.0106387   |
| GRIN3B    | ENSG00000116032 | 3.8476683    | 0.040971722 |
| LY6H      | ENSG00000176956 | 4.103052055  | 0.001162307 |
| SYNGR3    | ENSG00000127561 | 4.817786337  | 0.030258958 |
| C1orf173  | ENSG00000178965 | 4.861641392  | 0.02970214  |
| SNCG      | ENSG00000173267 | 5.534611789  | 0.043346414 |
| TULP1     | ENSG00000112041 | 6.486963414  | 0.001649509 |
| COMT      | ENSG00000093010 | 8.873079174  | 0.000335146 |
| SLC6A3    | ENSG00000142319 | 12.83009295  | 0.028470159 |

**Table S10: Disease associated genes differentially expressed in PD NPCs**

| Gene Name | Ensembl ID      | Fold Change | Disease-associated                                                                                    |
|-----------|-----------------|-------------|-------------------------------------------------------------------------------------------------------|
| TYW3      | ENSG00000162623 | 0,003       | ALS                                                                                                   |
| CRYZ      | ENSG00000116791 | 0,011       | ALS                                                                                                   |
| GDF3      | ENSG00000184344 | 0,051       | Klippel-Feil syndrome 3, autosomal dominant (KFS3); Microphthalmia, isolated, with coloboma, 6        |
| CAV1      | ENSG00000105974 | 0,349       | Lipodystrophy                                                                                         |
| GLRB      | ENSG00000109738 | 2,268       | <u>Hyperekplexia 2 (HKPX2)</u>                                                                        |
| TEKT3     | ENSG00000125409 | 2,894       | Charcot-Marie-Tooth disease                                                                           |
| CHST6     | ENSG00000183196 | 2,898       | Macular dystrophy                                                                                     |
| PRKG2     | ENSG00000138669 | 2,916       | Epilepsy, Temporal lobe epilepsy, Intellectual disability                                             |
| PCBP3     | ENSG00000183570 | 2,937       | Nutritional and Metabolic Diseases                                                                    |
| CERKL     | ENSG00000188452 | 2,970       | Retinitis pigmentosa 26                                                                               |
| CDH15     | ENSG00000129910 | 3,006       | Mental retardation                                                                                    |
| CADM2     | ENSG00000175161 | 3,079       | Mental disorders                                                                                      |
| CDK18     | ENSG00000117266 | 3,097       | Alzheimer's disease                                                                                   |
| CAMK1G    | ENSG00000008118 | 3,208       | ALS                                                                                                   |
| NXPH3     | ENSG00000182575 | 3,223       | Sjögren-Larsson syndrome                                                                              |
| ADAMTS4   | ENSG00000158859 | 3,325       | Alzheimer's disease                                                                                   |
| IGLON5    | ENSG00000142549 | 3,614       | Tauopathies, Encephalitis, Movement disorders, Cerebellar Ataxia                                      |
| GFRA2     | ENSG00000168546 | 3,664       | Parkinsonian disorders, Schizophrenia, Bipolar disorder, FTD, Neuropathy                              |
| GABRQ     | ENSG00000147402 | 3,727       | Schizophrenia, ASD, Anxiety disorders                                                                 |
| PDYN      | ENSG00000101327 | 3,771       | Spinocerebellar ataxia 23 (SCA23), Mental depression, Mood disorders, Schizophrenia, Bipolar disorder |

|          |                 |        |                                                                                                                                                     |
|----------|-----------------|--------|-----------------------------------------------------------------------------------------------------------------------------------------------------|
| GRIN3B   | ENSG00000116032 | 3,848  | Schizophrenia, Alzheimer's disease; ALS, Epilepsy                                                                                                   |
| LGI4     | ENSG00000153902 | 4,031  | Arthrogryposis multiplex congenita, neurogenic, with myelin defect (AMCNMY)                                                                         |
| NTRK1    | ENSG00000198400 | 4,306  | Congenital insensitivity to pain with anhidrosis (CIPA)                                                                                             |
| TMEM132E | ENSG00000181291 | 4,637  | patient with 17q11.2 microdeletion syndrome (facial dysmorphism, mental retardation, developmental delay, and an excessive number of neurofibromas) |
| SYNGR3   | ENSG00000127561 | 4,818  | Alzheimer's disease                                                                                                                                 |
| C1orf173 | ENSG00000178965 | 4,862  | Mental disorders                                                                                                                                    |
| CALN1    | ENSG00000183166 | 5,592  | Schizophrenia                                                                                                                                       |
| PRDM12   | ENSG00000130711 | 6,193  | Neuropathy, hereditary sensory and autonomic, 8 (HSAN8)                                                                                             |
| HMX1     | ENSG00000215612 | 6,826  | Oculoauricular syndrome (OCACS)1                                                                                                                    |
| NEUROG1  | ENSG00000181965 | 8,068  | Mental disorders                                                                                                                                    |
| NEUROD1  | ENSG00000162992 | 8,264  | Maturity-onset diabetes of the young 6 (MODY6)                                                                                                      |
| COMT     | ENSG00000093010 | 8,873  | Schizophrenia                                                                                                                                       |
| SLC6A3   | ENSG00000142319 | 12,830 | Parkinsonism-dystonia infantile (PKDYS)                                                                                                             |



**Table S11: DEGs mean expression in iPSC-derived NPC and neurons**

| GENE NAME | Mean Expression at NPC stage | Mean Expression at Neuron stage | P value  |
|-----------|------------------------------|---------------------------------|----------|
| HES1      | 1497                         | 875                             | 0,060216 |
| NFIA      | 183,5                        | 1798                            | 0,000204 |
| LMX1A     | 858,5                        | 147,25                          | 0,035347 |
| LMX1B     | 859                          | 941,75                          | 0,86885  |
| OTX2      | 1294,25                      | 266,25                          | 0,017262 |
| FOXA2     | 49,25                        | 26                              | 0,281164 |
| DCX       | 1603,75                      | 10856,25                        | 0,010774 |
| MAP2      | 4479                         | 16271                           | 0,005457 |
| TUBB3     | 132,25                       | 449,25                          | 0,008913 |
| RBFOX3    | 71,75                        | 498,5                           | 0,00571  |
| TH        | 77,25                        | 842                             | 0,030418 |
| KCNJ6     | 11                           | 40,25                           | 0,102857 |
| PBX1      | 4601                         | 5372                            | 0,394065 |
| LMO3      | 626,75                       | 929,75                          | 0,285857 |
| SYT1      | 795,75                       | 2701                            | 0,004246 |
| SNAP25    | 386,25                       | 1962,5                          | 0,0012   |

Table S12: Metabolism genes expression in PD neurons

| Gene Name     | Ensembl ID             | Fold Change        | P Value           |
|---------------|------------------------|--------------------|-------------------|
| <b>TYW3</b>   | <b>ENSG00000162623</b> | <b>-7,73042002</b> | <b>4,3351E-16</b> |
| <b>CRYZ</b>   | <b>ENSG00000116791</b> | <b>-9,35666627</b> | <b>1,6354E-27</b> |
| ALOX15B       | ENSG00000179593        | 0                  | 1                 |
| GLIPR1        | ENSG00000139278        | -0,11454588        | 0,87792097        |
| CERS3         | ENSG00000154227        | -0,95825583        | 0,50271101        |
| NPPA          | ENSG00000175206        | -0,47878303        | 0,3580525         |
| PON1          | ENSG00000005421        | 0,34094006         | 1                 |
| <b>NNMT</b>   | <b>ENSG00000166741</b> | <b>-1,86371017</b> | <b>0,0446333</b>  |
| AGPAT9        | ENSG00000138678        | 0,10319326         | 0,87069888        |
| <b>PTGR1</b>  | <b>ENSG00000106853</b> | <b>-1,94022541</b> | <b>0,00021669</b> |
| NQO1          | ENSG00000181019        | 0,30455055         | 0,4522212         |
| GBP1          | ENSG00000117228        | -0,40409305        | 0,64022594        |
| ADM           | ENSG00000148926        | -0,92650638        | 0,16769368        |
| MT1X          | ENSG00000187193        | -0,22701909        | 0,95529553        |
| SGMS2         | ENSG00000164023        | 0,84281495         | 0,12462623        |
| C8orf47       | ENSG00000177459        | -0,38117838        | 0,94409111        |
| GCLM          | ENSG00000023909        | 0,00861202         | 0,94607204        |
| MT2A          | ENSG00000125148        | -0,10546017        | 0,9884541         |
| ME1           | ENSG00000065833        | -0,51860901        | 0,27232623        |
| GBP2          | ENSG00000162645        | 1,21184794         | 0,72558748        |
| MT1F          | ENSG00000198417        | 1,42962666         | 0,48979961        |
| FTL           | ENSG00000087086        | -0,08971125        | 0,68288573        |
| TYRP1         | ENSG00000107165        | -0,80225254        | 0,54950897        |
| RARRES2       | ENSG00000106538        | -0,66558143        | 0,70105019        |
| LPAR6         | ENSG00000139679        | 0,64545913         | 0,34079903        |
| SLC25A27      | ENSG00000153291        | -0,11880006        | 0,82930883        |
| ATP8A1        | ENSG00000124406        | -0,00059872        | 0,78429645        |
| ADSSL1        | ENSG00000185100        | -0,38172422        | 0,40459282        |
| <b>ALPL</b>   | <b>ENSG00000162551</b> | <b>1,67562119</b>  | <b>0,00527182</b> |
| LOXL3         | ENSG00000115318        | 0,16283252         | 0,76874227        |
| PLCG2         | ENSG00000197943        | 1,49545168         | 0,06346525        |
| SULT4A1       | ENSG00000130540        | -0,5043528         | 0,429242          |
| <b>CHST6</b>  | <b>ENSG00000183196</b> | <b>-1,58864916</b> | <b>0,00217305</b> |
| PCBP3         | ENSG00000183570        | 0,09405466         | 0,77525366        |
| <b>TXNRD2</b> | <b>ENSG00000184470</b> | <b>2,4313034</b>   | <b>0,01038325</b> |
| GLYATL2       | ENSG00000156689        | 0,45524892         | 0,36675665        |
| <b>PTGS1</b>  | <b>ENSG00000095303</b> | <b>1,29783299</b>  | <b>0,04638282</b> |
| HSD11B2       | ENSG00000176387        | -0,16600545        | 0,86875626        |
| CLEC18C       | ENSG00000157335        | 1,31105665         | 0,11381725        |

|             |                        |                   |                  |
|-------------|------------------------|-------------------|------------------|
| FGF19       | ENSG00000162344        | 1,71508199        | 0,13615063       |
| SELV        | ENSG00000186838        | 1,50750235        | 0,10607643       |
| MPPED1      | ENSG00000186732        | -0,35530487       | 0,64885027       |
| OAS3        | ENSG00000111331        | 0,0359823         | 0,98994395       |
| GCKR        | ENSG00000084734        | -0,83818735       | 0,46109736       |
| LDHD        | ENSG00000166816        | -0,93276758       | 0,10899141       |
| CRIP3       | ENSG00000146215        | -0,32138131       | 0,69911775       |
| SLC25A41    | ENSG00000181240        | 0,61275162        | 0,33802711       |
| <b>IAH1</b> | <b>ENSG00000134330</b> | <b>1,90184679</b> | <b>0,0121563</b> |
| CLEC19A     | ENSG00000261210        | -0,01152898       | 0,88379615       |
| CA7         | ENSG00000168748        | -0,39468628       | 0,71878321       |

Table S13: Differentiation and Development genes expression in PD neurons

| Gene Name     | Ensembl ID             | Fold Change        | P Value            |
|---------------|------------------------|--------------------|--------------------|
| GDF3          | ENSG00000184344        | -1,01523754        | 0,436831113        |
| <b>OSGIN1</b> | <b>ENSG00000140961</b> | <b>-1,32659683</b> | <b>0,007057145</b> |
| OGN           | ENSG00000106809        | 0,415353047        | 1                  |
| NELL1         | ENSG00000165973        | -0,35459829        | 0,83492534         |
| EDN1          | ENSG00000078401        | 0,418083383        | 0,470813774        |
| GBP4          | ENSG00000162654        | -1,55950408        | 0,352716138        |
| YPEL1         | ENSG00000100027        | -0,05616904        | 0,852711898        |
| CHRD1         | ENSG00000101938        | -0,58557981        | 0,302794299        |
| ERBB3         | ENSG00000065361        | -0,71393394        | 0,140150876        |
| EFNA2         | ENSG00000099617        | -0,1529949         | 0,804873787        |
| SOX8          | ENSG00000005513        | -0,80340381        | 0,069688058        |
| NEUROG2       | ENSG00000178403        | 0,679385941        | 0,416547903        |
| <b>CECR1</b>  | <b>ENSG00000093072</b> | <b>2,162941506</b> | <b>0,000757315</b> |
| DTX1          | ENSG00000135144        | -0,8022317         | 0,325358431        |
| HEYL          | ENSG00000163909        | -0,01106932        | 0,977214465        |
| <b>EYA2</b>   | <b>ENSG00000064655</b> | <b>1,67480419</b>  | <b>0,003458066</b> |
| LAPTM5        | ENSG00000162511        | -0,23648863        | 0,62600918         |
| POU4F1        | ENSG00000152192        | 0,242671535        | 0,484081309        |
| WIF1          | ENSG00000156076        | 0,157309374        | 0,88997811         |
| LGI4          | ENSG00000153902        | -0,48019045        | 0,402845352        |
| NTRK1         | ENSG00000198400        | 1,81266908         | 0,066607888        |
| FOXD3         | ENSG00000187140        | -0,24955468        | 0,969716191        |
| ISLR2         | ENSG00000167178        | -0,65545087        | 0,22986653         |
| DCDC2         | ENSG00000146038        | #N/A               | 0,562016675        |
| FOXN4         | ENSG00000139445        | 0,311774187        | 0,47150559         |
| C1orf111      | ENSG00000171722        | 0,090358105        | 0,855553271        |
| NTN5          | ENSG00000142233        | -0,28200946        | 0,535558961        |

|         |                 |             |             |
|---------|-----------------|-------------|-------------|
| NOTUM   | ENSG00000185269 | -0,16464993 | 0,830160869 |
| CRHR1   | ENSG00000120088 | -0,51293854 | 0,23484302  |
| NEUROG1 | ENSG00000181965 | 0,03709293  | 0,854716792 |
| MAATS1  | ENSG00000183833 | 1,956619734 | 0,065780305 |
| NEUROD1 | ENSG00000162992 | 0,602480959 | 0,396867729 |

Table S14: Ion Channels & Transporters genes expression in PD neurons

| Gene Name | Ensembl ID      | Fold Change | P Value     |
|-----------|-----------------|-------------|-------------|
| BEST3     | ENSG00000127325 | 1,226453273 | 0,564078453 |
| KCNE4     | ENSG00000152049 | 0,925214234 | 0,842844698 |
| KCNJ15    | ENSG00000157551 | 1,032442307 | 0,849315545 |
| KCNAB3    | ENSG00000170049 | 1,020376415 | 0,96878023  |
| KCNQ2     | ENSG00000075043 | 0,975483991 | 0,749588277 |
| KCNC1     | ENSG00000129159 | 1,580912598 | 0,309223942 |
| SLC38A3   | ENSG00000188338 | 1,187557438 | 0,613165883 |
| KCNQ4     | ENSG00000117013 | 0,754387631 | 0,864047388 |
| KCNK5     | ENSG00000164626 | 0,60556424  | 0,282371088 |
| CACNG6    | ENSG00000130433 | 0,964890978 | 0,937560238 |
| BEST4     | ENSG00000142959 | 0,917782831 | 0,669284561 |
| KCNQ1     | ENSG00000053918 | 2,089425442 | 0,063488186 |
| KCNH6     | ENSG00000173826 | 1,768795027 | 0,415431368 |

Table S15: Cell Adhesion & ECM genes expression in PD neurons

| GENE_NAME     | ENSEMBL ID             | Fold Change         | P Value            |
|---------------|------------------------|---------------------|--------------------|
| <b>CTHRC1</b> | <b>ENSG00000164932</b> | <b>-2,792084341</b> | <b>0,049278235</b> |
| <b>ZP3</b>    | <b>ENSG00000188372</b> | <b>-1,931154232</b> | <b>0,005079308</b> |
| SPP1          | ENSG00000118785        | -1,385216646        | 0,269432328        |
| TNC           | ENSG00000041982        | -0,237561242        | 0,651553299        |
| TNFRSF12A     | ENSG00000006327        | -0,596322387        | 0,186048066        |
| ADAMTS16      | ENSG00000145536        | -0,094442651        | 0,778898814        |
| SERPINB8      | ENSG00000166401        | -0,258077166        | 0,714920437        |
| LAMC2         | ENSG00000058085        | -1,04806624         | 0,119306128        |
| CRYAB         | ENSG00000109846        | -0,459884204        | 0,452134393        |
| TAGLN2        | ENSG00000158710        | -0,710732326        | 0,116919659        |
| FAM184A       | ENSG00000111879        | 0,09754491          | 0,816672328        |
| NKD2          | ENSG00000145506        | 0,07037187          | 0,81246326         |
| COL9A2        | ENSG00000049089        | 0,507811369         | 0,301747253        |
| CDH23         | ENSG00000107736        | -0,1855838          | 0,768193455        |
| FLRT1         | ENSG00000126500        | -0,691714365        | 0,113143354        |
| <b>CDH15</b>  | <b>ENSG00000129910</b> | <b>-1,006192761</b> | <b>0,036483845</b> |
| ITGA4         | ENSG00000115232        | -0,16366983         | 0,655521856        |

|               |                        |                   |                    |
|---------------|------------------------|-------------------|--------------------|
| NXPH3         | ENSG00000182575        | -1,713792158      | 0,31671285         |
| ADAMTS4       | ENSG00000158859        | -0,130056827      | 0,691678416        |
| CGREF1        | ENSG00000138028        | -0,139841559      | 0,939851222        |
| CDHR2         | ENSG00000074276        | 0,443634141       | 0,470659809        |
| ITGA2B        | ENSG00000005961        | -0,362171928      | 0,436176836        |
| COL11A2       | ENSG00000204248        | 0,33721123        | 0,804420597        |
| <b>ART5</b>   | <b>ENSG00000167311</b> | <b>1,94357123</b> | <b>0,013448789</b> |
| <b>PCDHA6</b> | <b>ENSG00000081842</b> | <b>2,26000165</b> | <b>0,00519631</b>  |

Table S16: Synapse-associated genes expression in PD neurons

| Gene Name      | Ensembl ID             | Fold Change         | P Value            |
|----------------|------------------------|---------------------|--------------------|
| <b>SLITRK4</b> | <b>ENSG00000179542</b> | <b>-2,096086518</b> | <b>5,53298E-05</b> |
| GRID1          | ENSG00000182771        | -0,969066527        | 0,087599644        |
| FLRT2          | ENSG00000185070        | 0,023361819         | 0,796876513        |
| ROBO1          | ENSG00000169855        | -0,024305202        | 0,801483468        |
| GLRB           | ENSG00000109738        | 0,009257127         | 0,956742668        |
| <b>GRIP2</b>   | <b>ENSG00000144596</b> | <b>-1,211083365</b> | <b>0,015363659</b> |
| PRRT1          | ENSG00000204314        | -0,247679307        | 0,500570141        |
| CHRNA4         | ENSG00000117971        | -0,133523119        | 1                  |
| SYCP2L         | ENSG00000153157        | -0,195332404        | 0,507502306        |
| SYT7           | ENSG00000011347        | -0,893415622        | 0,137854816        |
| PRKG2          | ENSG00000138669        | 0,336601587         | 0,622624745        |
| DOC2A          | ENSG00000149927        | -0,748039137        | 0,528130378        |
| CADM2          | ENSG00000175161        | -0,487076773        | 0,690029003        |
| GRIK4          | ENSG00000149403        | -0,900717154        | 0,088316529        |
| GABRQ          | ENSG00000147402        | -0,896692823        | 0,15011532         |
| GRIN3B         | ENSG00000116032        | 0,134416584         | 0,971023085        |
| LY6H           | ENSG00000176956        | 0,625875237         | 0,246297842        |
| SYNGR3         | ENSG00000127561        | -1,02924112         | 0,112523322        |
| C1orf173       | ENSG00000178965        | 1,110223798         | 0,441980185        |
| SNCG           | ENSG00000173267        | 0,034025394         | 0,972734622        |
| TULP1          | ENSG00000112041        | 1,485300948         | 0,218735106        |
| <b>COMT</b>    | <b>ENSG00000093010</b> | <b>4,05315194</b>   | <b>0,003152408</b> |
| SLC6A3         | ENSG00000142319        | 0,789603819         | 0,603926287        |

Table S17: Cytoskeleton genes expression in PD neurons

| Gene Name | Ensembl ID      | Fold Change  | P Value     |
|-----------|-----------------|--------------|-------------|
| ACTG2     | ENSG00000163017 | -0,293354527 | 0,650390595 |
| TAGLN     | ENSG00000149591 | -0,335685968 | 0,458114991 |
| UPK1B     | ENSG00000114638 | 0,284587507  | 0,994074939 |
| PALMD     | ENSG00000099260 | -0,145112743 | 0,685605657 |

|               |                        |                     |                    |
|---------------|------------------------|---------------------|--------------------|
| ACTA2         | ENSG00000107796        | 0,142994441         | 0,811931362        |
| MYH6          | ENSG00000197616        | 0,410769592         | 0,979210371        |
| SYNM          | ENSG00000182253        | -0,11481957         | 0,767161477        |
| PDLIM3        | ENSG00000154553        | -0,524632155        | 0,266939459        |
| NRK           | ENSG00000123572        | -0,458731002        | 0,223838342        |
| <b>MAP7D3</b> | <b>ENSG00000129680</b> | <b>-1,959574414</b> | <b>0,008451711</b> |
| MYOM2         | ENSG00000036448        | -0,203715774        | 0,62576461         |
| SYNPO         | ENSG00000171992        | -0,030267254        | 0,784157213        |
| THSD7B        | ENSG00000144229        | 0,472749606         | 0,495638921        |
| TEKT3         | ENSG00000125409        | 0,100438087         | 0,992808474        |
| TTLL6         | ENSG00000170703        | 0,069561816         | 0,869873967        |
| DNAH2         | ENSG00000183914        | -0,418971938        | 0,410745351        |
| JAKMIP1       | ENSG00000152969        | -1,160509345        | 0,325821723        |
| SAMSN1        | ENSG00000155307        | 1,285389794         | 0,362205922        |
